# Supplementary material for: Genetic associations with dementia‐related proteinopathy: Application of item response theory
Source: PubMed Central journal article supplement — Alzheimers Dement. 2024 Mar 9;20(4):2906–21. doi: 10.1002/alz.13741 (PMC11032554; doi:10.1002/alz.13741), 2024-03-09
Supplement: ALZ-20-2906-s002.pdf [file ALZ-20-2906-s002.pdf]

**Supplementary Table 1.** Variable names in each neuropathology dataset

| Neuropathology               | NACC                         | ADNI    | ROSMAP                                                                |
|------------------------------|------------------------------|---------|-----------------------------------------------------------------------|
| Amyloid plaques              | NPTHAL                       |         | plaq_d <sup>†</sup>                                                   |
| 0                            | Phase 0 (A0)                 |         | 0                                                                     |
| 1                            | Phase 1-2 (A1)               |         | ≤0.5                                                                  |
| 2                            | Phase 3 (A2)                 |         | ≤1                                                                    |
| 3                            | Phase 4-5 (A3)               |         | >1                                                                    |
| Tau neurofibrillary tangles  | NACCBRAA                     | NPBRAAK | braaksc                                                               |
| 0                            | Stage 0 (B0)                 |         |                                                                       |
| 1                            | Stage I-II (B1)              |         |                                                                       |
| 2                            | Stage III-IV (B2)            |         |                                                                       |
| 3                            | Stage V-VI (B3)              |         |                                                                       |
| Neocortical neuritic plaques | NACCNEUR                     | NPNEUR  | ceradsc                                                               |
| 0                            | No (C0)                      |         | No                                                                    |
| 1                            | Sparse (C1)                  |         | Possible                                                              |
| 2                            | Moderate (C2)                |         | Probable                                                              |
| 3                            | Frequent (C3)                |         | Definite                                                              |
| TDP-43 in amygdala           | NPTDPB                       |         | tdp_st4                                                               |
| 0                            | No                           |         | None                                                                  |
| 1                            | Yes                          |         | Amygdala<br>/Amygdala + Limbic<br>/Amygdala + Limbic<br>+ Neocortical |
| TDP-43 in limbic             | NPTDPC/NPTDPD                |         |                                                                       |
| 0                            | No                           |         | None/Amygdala                                                         |
| 1                            | Yes                          |         | Amygdala + Limbic<br>/Amygdala + Limbic<br>+ Neocortical              |
| TDP-43 in neocortex          | NPTDPE                       |         |                                                                       |
| 0                            | No                           |         | None/Amygdala<br>/Amygdala + Limbic                                   |
| 1                            | Yes                          |         | Amygdala + Limbic<br>+ Neocortical                                    |
| Lewy bodies                  | NACCLEWY                     | NPLBOD  | dlbdx                                                                 |
| 0                            | No                           |         | Not present                                                           |
| 1                            | Other regions                |         | Nigral-predominant/<br>Limbic-type                                    |
| 2                            | Neocortical region           |         | neocortical-type                                                      |
| Hippocampal sclerosis        | NPHIPSCL                     |         | hspath_typ                                                            |
| 0                            | None                         |         | Not present                                                           |
| 1                            | Unilateral/Bilateral/present |         | Definitely present                                                    |

<sup>†</sup> Diffuse plaques across regions were used in ROSMAP instead of Thal phase ratings

NACC = National Alzheimer's Coordinating Center; ADNI = Alzheimer's Disease Neuroimaging Initiative; ROSMAP = Religious Orders Study and Rush Memory and Aging Project; NFT = neurofibrillary tangle

**Supplementary Table 2.** Filtering criteria for whole genome sequencing genotype calling data

| Description                                                               | ID             | Criteria    |
|---------------------------------------------------------------------------|----------------|-------------|
| INFO                                                                      |                |             |
| Allele count in genotypes                                                 | AC             | <2          |
| Approximate read depth                                                    | DP             | <10         |
| RMS Mapping Quality                                                       | MQ             | <40         |
| Z-score From Wilcoxon rank sum test of Alt vs. Ref read mapping qualities | MQRankSum      | <-12.5      |
| Z-score from Wilcoxon rank sum test of Alt Vs. Ref base qualities         | BaseQRankSum   | <-10 or >10 |
| Phred-scaled p-value using Fisher's exact test to detect strand bias      | FS             | >100        |
| Symmetric Odds Ratio of 2x2 contingency table to detect strand bias       | SOR            | >5          |
| Z-score from Wilcoxon rank sum test of Alt vs. Ref read position bias     | ReadPosRankSum | <-10 or >10 |
| Variant Confidence/Quality by Depth                                       | QD             | <2          |
| FORMAT                                                                    |                |             |
| Approximate read depth                                                    | DP             | <10         |
| Genotype Quality                                                          | GQ             | <30         |

```
bcftools filter -e 'INFO/AC<2 || INFO/DP<10 || INFO/MQ<40 || INFO/MQRankSum<-12.5 || INFO/BaseQRankSum<-10 || INFO/BaseQRankSum>10 || INFO/FS>100 || INFO/SOR>5 || INFO/ReadPosRankSum<-10 || INFO/ReadPosRankSum>10 || INFO/QD<2' -O z -o output.vcf.gz --threads 100 input.vcf.gz
```

```
bcftools annotate -x ^FORMAT/GT,FORMAT/AD,FORMAT/DP,FORMAT/GQ,FORMAT/PL input.vcf.gz | bcftools filter -S . -i '\"FORMAT/DP>=10 & FORMAT/GQ>=30\"' - | gzip -c > output.vcf.gz'
```

**Supplementary Table 3.** Characteristics of included and excluded participant groups due to missing data

| Characteristics                                                         | Participants without missing data<br>(n = 1,304) | Participants with at least one missing data<br>(n = 1,387) | P-value              |
|-------------------------------------------------------------------------|--------------------------------------------------|------------------------------------------------------------|----------------------|
| Age at death, mean ± SD                                                 | 83.0 ± 9.1                                       | 84.1 ± 9.0                                                 | 0.0024               |
| Years in education, mean ± SD                                           | 16.5 ± 8.5                                       | 16.5 ± 9.4                                                 | 0.99                 |
| Sex, n (%)                                                              |                                                  |                                                            |                      |
| Male                                                                    | 641 (49.2)                                       | 722 (52.1)                                                 | 0.14                 |
| Female                                                                  | 663 (50.8)                                       | 665 (47.9)                                                 |                      |
| Thal phase / diffuse plaques*, n (%)                                    |                                                  |                                                            |                      |
| 0 / 0                                                                   | 102 (7.8)                                        | 18 (1.3)                                                   | 3.8×10 <sup>-9</sup> |
| 1-2 / ≤0.5                                                              | 115 (8.8)                                        | 202 (14.7)                                                 |                      |
| 3 / ≤1                                                                  | 114 (8.7)                                        | 312 (22.7)                                                 |                      |
| 4-5 / >1                                                                | 973 (74.6)                                       | 843 (61.3)                                                 |                      |
| Braak NFT stage, n (%)                                                  |                                                  |                                                            |                      |
| 0                                                                       | 25 (1.9)                                         | 18 (1.3)                                                   | 0.20                 |
| I-II                                                                    | 177 (13.6)                                       | 202 (14.7)                                                 |                      |
| III-IV                                                                  | 266 (20.4)                                       | 312 (22.7)                                                 |                      |
| V-VI                                                                    | 836 (64.1)                                       | 843 (61.3)                                                 |                      |
| Neuritic plaques, n (%)                                                 |                                                  |                                                            |                      |
| No                                                                      | 196 (15.0)                                       | 233 (16.9)                                                 | 5.6×10 <sup>-9</sup> |
| Sparse                                                                  | 140 (10.7)                                       | 137 (9.9)                                                  |                      |
| Moderate                                                                | 222 (17.0)                                       | 334 (24.2)                                                 |                      |
| Frequent                                                                | 746 (57.2)                                       | 676 (49.0)                                                 |                      |
| TDP-43 in amygdala, n (%)                                               |                                                  |                                                            |                      |
| No                                                                      | 860 (66.0)                                       | 262 (82.6)                                                 | 1.1×10 <sup>-8</sup> |
| Yes                                                                     | 444 (34.0)                                       | 55 (17.4)                                                  |                      |
| TDP-43 in hippocampus and/or entorhinal/inferior temporal cortex, n (%) |                                                  |                                                            |                      |
| No                                                                      | 884 (67.8)                                       | 112 (47.1)                                                 | 1.2×10 <sup>-9</sup> |
| Yes                                                                     | 420 (32.2)                                       | 126 (52.9)                                                 |                      |
| TDP-43 in neocortex, n (%)                                              |                                                  |                                                            |                      |
| No                                                                      | 1240 (95.1)                                      | 341 (95.5)                                                 | 0.85                 |
| Yes                                                                     | 64 (4.9)                                         | 16 (4.5)                                                   |                      |
| Lewy bodies, n (%)                                                      |                                                  |                                                            |                      |
| No                                                                      | 713 (54.7)                                       | 842 (61.4)                                                 | 7.4×10 <sup>-4</sup> |
| Other regions                                                           | 384 (29.4)                                       | 322 (23.5)                                                 |                      |
| Neocortex                                                               | 207 (15.9)                                       | 208 (15.2)                                                 |                      |
| Hippocampal sclerosis, n (%)                                            |                                                  |                                                            |                      |
| No                                                                      | 1109 (85.0)                                      | 1132 (87.3)                                                | 0.10                 |
| Yes                                                                     | 195 (15.0)                                       | 164 (12.7)                                                 |                      |

SD = standard deviation; NFT = neurofibrillary tangle

**Supplementary Table 4.** Rotated factor loadings with the oblimin rotation in NACC/ADNI and ROSMAP

| Neuropathology        | NACC/ADNI |        |        | ROSMAP |        |        |
|-----------------------|-----------|--------|--------|--------|--------|--------|
|                       | F1        | F2     | F3     | F1     | F2     | F3     |
| Braak NFT stage       | -0.014    | 0.881  | 0.023  | -0.074 | 0.629  | 0.014  |
| Neuritic plaques      | 0.044     | 0.890  | -0.012 | 0.078  | 0.618  | 0.065  |
| Thal phase            | -0.021    | 0.959  | -0.012 | 0.004  | 0.894  | -0.022 |
| TDP-43 in amygdala    | 0.922     | 0.056  | 0.099  | 0.747  | -0.045 | 0.072  |
| TDP-43 in limbic      | 0.995     | 0.035  | -0.039 | 0.997  | -0.020 | 0.008  |
| TDP-43 in neocortex   | 0.935     | -0.080 | -0.033 | 0.996  | 0.012  | -0.021 |
| Hippocampal sclerosis | 0.671     | -0.027 | -0.024 | 0.988  | 0.031  | -0.018 |
| Lewy bodies           | 0.002     | -0.004 | 0.974  | -0.001 | 0.003  | 0.984  |

NACC = National Alzheimer's Coordinating Center; ADNI = Alzheimer's Disease Neuroimaging Initiative; ROSMAP = Religious Orders Study and Rush Memory and Aging Project; NFT = neurofibrillary tangle

**Supplementary Table 5.** Number of missing data in each single nucleotide variant displayed in Tables 2 and 3

|          | CHR | Gene             | SNV         | Position  | # of missing  |        |               |        |
|----------|-----|------------------|-------------|-----------|---------------|--------|---------------|--------|
|          |     |                  |             |           | ≥ 65 at death |        | ≥ 80 at death |        |
|          |     |                  |             |           | NACC/ADNI     | ROSMAP | NACC/ADNI     | ROSMAP |
| Table 2  |     |                  |             |           |               |        |               |        |
|          | 1   | <i>GBA</i>       | rs140335079 | 155237596 | 0             | 0      |               |        |
|          | 2   | <i>BINI</i>      | rs6733839   | 127135234 | 2             | 1      |               |        |
|          | 7   | <i>TMEM106B</i>  | rs10950392  | 12223912  | 0             | 10     |               |        |
|          | 17  | <i>GRN</i>       | rs5848      | 44352876  | 2             | 0      |               |        |
|          | 19  | <i>APOE</i>      | rs429358    | 44908684  | 2             | 2      |               |        |
| Table 3  |     |                  |             |           |               |        |               |        |
| Factor 1 |     |                  |             |           |               |        |               |        |
|          | 1   | <i>KAZN</i>      | rs72643142  | 14148707  | 1             | 0      | 0             | 0      |
|          | 5   | <i>ARHGEF28</i>  | rs80190672  | 73973002  | 0             | 0      | 0             | 0      |
|          | 15  | <i>UNC13C</i>    | rs141108370 | 54631819  | 0             | 1      | 0             | 1      |
| Factor 2 |     |                  |             |           |               |        |               |        |
|          | 1   | <i>C1orf185</i>  | rs72692278  | 51129361  | 1             | 1      | 0             | 1      |
|          | 1   | <i>ZNF281</i>    | rs188482877 | 200431363 | 0             | 4      | 0             | 4      |
|          | 12  | <i>GRIN2B</i>    | rs71457202  | 13748154  | 0             | 0      | 0             | 0      |
|          | 13  | <i>LINC00559</i> | rs145442832 | 89883465  | 1             | 0      | 0             | 0      |
|          | 14  | <i>TLL5</i>      | rs745536628 | 75760859  | 1             | 0      | 0             | 0      |
| Factor 3 |     |                  |             |           |               |        |               |        |
|          | 6   | <i>TNFRSF21</i>  | rs78794444  | 47311493  | 1             | 0      | 0             | 0      |
| Table 4  |     |                  |             |           |               |        |               |        |
| Factor 1 |     |                  |             |           |               |        |               |        |
|          | 8   | <i>TMEM68</i>    | rs28610182  | 55751840  | 2             | 4      |               |        |
|          | 19  | <i>SDHAF1</i>    | rs17706479  | 35994474  | 1             | 0      |               |        |
| Factor 2 |     |                  |             |           |               |        |               |        |
|          | 10  | <i>BMS1</i>      | rs3128722   | 4288490   | 0             | 0      |               |        |

NACC = National Alzheimer's Coordinating Center; ADNI = Alzheimer's Disease Neuroimaging Initiative; ROSMAP = Religious Orders Study and Rush Memory and Aging Project

**Supplementary Table 6.** Significant and suggestive significant single nucleotide variants associated with the estimated factor 1 (TDP-43 and hippocampal sclerosis) score in subjects aged 65 years or older at death and in subjects aged 80 years or older at death as a sensitivity analysis

| CHR       | Gene            | SNV                | Position        | Effect /reference | ≥ 65 at death |                            |              |              |                            |              |              |                            |               | ≥ 80 at death              |  |
|-----------|-----------------|--------------------|-----------------|-------------------|---------------|----------------------------|--------------|--------------|----------------------------|--------------|--------------|----------------------------|---------------|----------------------------|--|
|           |                 |                    |                 |                   | Meta-analysis |                            | NACC/ADNI    |              |                            | ROSMAP       |              |                            | Meta-analysis |                            |  |
|           |                 |                    |                 |                   | $\beta$       | P-value                    | AF           | $\beta$      | P-value                    | AF           | $\beta$      | P-value                    | $\beta$       | P-value                    |  |
| <b>1</b>  | <b>KAZN</b>     | <b>rs72643142</b>  | <b>14148707</b> | <b>T/C</b>        | <b>-0.40</b>  | <b>7.1×10<sup>-7</sup></b> | <b>0.101</b> | <b>-0.35</b> | <b>0.0033</b>              | <b>0.103</b> | <b>-0.45</b> | <b>6.4×10<sup>-5</sup></b> | <b>-0.48</b>  | <b>5.6×10<sup>-7</sup></b> |  |
| 1         | LPHN2           | rs17472472         | 82013634        | C/T               | 0.24          | 3.9×10 <sup>-6</sup>       | 0.385        | 0.22         | 0.0045                     | 0.347        | 0.25         | 3.0×10 <sup>-4</sup>       | 0.25          | 3.5×10 <sup>-5</sup>       |  |
| 2         | KLHL29          | rs55869619         | 23200869        | C/G               | 0.44          | 6.8×10 <sup>-6</sup>       | 0.067        | 0.52         | 1.9×10 <sup>-4</sup>       | 0.063        | 0.37         | 0.0097                     | 0.42          | 3.3×10 <sup>-4</sup>       |  |
| 2         | DDX18           | rs554736674        | 116872180       | A/G               | 0.70          | 2.6×10 <sup>-6</sup>       | 0.023        | 1.02         | 7.1×10 <sup>-6</sup>       | 0.030        | 0.45         | 0.025                      | 0.66          | 4.9×10 <sup>-4</sup>       |  |
| 4         | MSANTD1         | rs362285           | 3256594         | A/G               | -0.90         | 4.9×10 <sup>-6</sup>       | 0.011        | -0.97        | 0.0046                     | 0.018        | -0.86        | 3.7×10 <sup>-4</sup>       | -0.79         | 2.3×10 <sup>-4</sup>       |  |
| <b>5</b>  | <b>ARHGEF28</b> | <b>rs80190672</b>  | <b>73973002</b> | <b>G/A</b>        | <b>-0.64</b>  | <b>4.7×10<sup>-8</sup></b> | <b>0.046</b> | <b>-0.59</b> | <b>6.6×10<sup>-4</sup></b> | <b>0.041</b> | <b>-0.69</b> | <b>2.3×10<sup>-5</sup></b> | <b>-0.76</b>  | <b>5.8×10<sup>-8</sup></b> |  |
| 7         | TMEM106B        | rs10950392         | 12223912        | C/T               | -0.22         | 7.2×10 <sup>-6</sup>       | 0.431        | -0.23        | 0.0010                     | 0.414        | -0.21        | 0.0025                     | -0.25         | 3.0×10 <sup>-5</sup>       |  |
| 8         | TMEM68          | rs28610182         | 55751840        | A/G               | -0.29         | 1.1×10 <sup>-6</sup>       | 0.208        | -0.23        | 0.0075                     | 0.216        | -0.36        | 3.1×10 <sup>-5</sup>       | -0.31         | 2.5×10 <sup>-5</sup>       |  |
| 9         | RNU6ATAC        | rs147951468        | 134200170       | A/G               | 0.79          | 3.7×10 <sup>-6</sup>       | 0.020        | 0.82         | 0.0012                     | 0.021        | 0.77         | 0.0010                     | 0.63          | 3.6×10 <sup>-4</sup>       |  |
| 12        | CD9             | rs140383201        | 6164511         | T/C               | 0.93          | 3.1×10 <sup>-6</sup>       | 0.016        | 0.77         | 0.0043                     | 0.014        | 1.11         | 1.8×10 <sup>-4</sup>       | 1.22          | 6.8×10 <sup>-5</sup>       |  |
| 12        | MGAT4C          | rs11615307         | 87047504        | C/T               | 0.34          | 6.2×10 <sup>-6</sup>       | 0.128        | 0.41         | 2.2×10 <sup>-4</sup>       | 0.120        | 0.27         | 0.0067                     | 0.39          | 1.2×10 <sup>-5</sup>       |  |
| <b>15</b> | <b>UNC13C</b>   | <b>rs141108370</b> | <b>54631819</b> | <b>G/A</b>        | <b>-1.06</b>  | <b>5.7×10<sup>-7</sup></b> | <b>0.013</b> | <b>-1.09</b> | <b>4.3×10<sup>-4</sup></b> | <b>0.014</b> | <b>-1.02</b> | <b>4.5×10<sup>-4</sup></b> | <b>-1.25</b>  | <b>2.8×10<sup>-7</sup></b> |  |
| 16        | PARN            | rs77639069         | 14418707        | T/C               | 0.82          | 5.8×10 <sup>-6</sup>       | 0.019        | 0.90         | 7.4×10 <sup>-4</sup>       | 0.017        | 0.75         | 0.0026                     | 0.94          | 3.8×10 <sup>-5</sup>       |  |
| 18        | MIR4318         | rs77579757         | 37626039        | T/C               | -0.44         | 6.1×10 <sup>-6</sup>       | 0.061        | -0.37        | 0.014                      | 0.069        | -0.49        | 1.4×10 <sup>-4</sup>       | -0.45         | 6.7×10 <sup>-5</sup>       |  |
| 19        | SDHAF1          | rs17706479         | 35994474        | A/G               | 0.31          | 1.8×10 <sup>-6</sup>       | 0.184        | 0.38         | 3.5×10 <sup>-5</sup>       | 0.151        | 0.24         | 0.012                      | 0.30          | 9.2×10 <sup>-5</sup>       |  |
| 19        | CLIP3           | rs113229403        | 36021913        | T/C               | 0.30          | 4.5×10 <sup>-6</sup>       | 0.179        | 0.38         | 3.3×10 <sup>-5</sup>       | 0.153        | 0.21         | 0.025                      | 0.28          | 2.4×10 <sup>-4</sup>       |  |

Bolded results indicate single nucleotide variants which were confirmed as a suggestive significance in the sensitivity analysis for people who died 80 years or older.

CHR = chromosome; SNV = single nucleotide variant; NACC = National Alzheimer's Coordinating Center; ADNI = Alzheimer's Disease Neuroimaging Initiative; ROSMAP = Religious Orders Study and Rush Memory and Aging Project; AF = allele frequency

**Supplementary Table 7.** Significant and suggestive significant single nucleotide variants associated with the estimated factor 2 (Alzheimer's disease neuropathologic change related) score in subjects aged 65 years or older at death and in subjects aged 80 years or older at death as a sensitivity analysis

| CHR       | Gene                    | SNV                | Position         | Effect /reference | ≥ 65 at death |                            |              |               |                            |              |               |                            |               | ≥ 80 at death              |  |
|-----------|-------------------------|--------------------|------------------|-------------------|---------------|----------------------------|--------------|---------------|----------------------------|--------------|---------------|----------------------------|---------------|----------------------------|--|
|           |                         |                    |                  |                   | Meta-analysis |                            | NACC/ADNI    |               |                            | ROSMAP       |               |                            | Meta-analysis |                            |  |
|           |                         |                    |                  |                   | $\hat{\beta}$ | P-value                    | AF           | $\hat{\beta}$ | P-value                    | AF           | $\hat{\beta}$ | P-value                    | $\hat{\beta}$ | P-value                    |  |
| <b>1</b>  | <b><i>Clorf185</i></b>  | <b>rs72692278</b>  | <b>51129361</b>  | <b>A/G</b>        | <b>-0.50</b>  | <b>6.6×10<sup>-6</sup></b> | <b>0.052</b> | <b>-0.50</b>  | <b>0.0020</b>              | <b>0.058</b> | <b>-0.49</b>  | <b>0.0012</b>              | <b>-0.58</b>  | <b>7.2×10<sup>-6</sup></b> |  |
| 1         | <i>LRRC7</i>            | rs79165012         | 69428372         | T/C               | -1.05         | 1.7×10 <sup>-6</sup>       | 0.013        | -1.12         | 3.8×10 <sup>-4</sup>       | 0.014        | -0.99         | 0.0015                     | -1.11         | 1.3×10 <sup>-5</sup>       |  |
| <b>1</b>  | <b><i>ZNF281</i></b>    | <b>rs188482877</b> | <b>200431363</b> | <b>T/A</b>        | <b>-1.00</b>  | <b>3.2×10<sup>-6</sup></b> | <b>0.015</b> | <b>-1.14</b>  | <b>1.4×10<sup>-4</sup></b> | <b>0.014</b> | <b>-0.84</b>  | <b>0.0066</b>              | <b>-1.12</b>  | <b>3.3×10<sup>-6</sup></b> |  |
| 4         | <i>SPINK2</i>           | rs34986806         | 56843293         | C/T               | -0.66         | 5.3×10 <sup>-6</sup>       | 0.037        | -0.65         | 6.2×10 <sup>-4</sup>       | 0.026        | -0.67         | 0.0031                     | -0.61         | 7.7×10 <sup>-4</sup>       |  |
| 5         | <i>PARP8</i>            | rs149949227        | 50746672         | A/T               | -0.88         | 5.1×10 <sup>-6</sup>       | 0.020        | -1.05         | 4.7×10 <sup>-5</sup>       | 0.015        | -0.65         | 0.0266                     | -0.58         | 0.0089                     |  |
| 5         | <i>LOC101928448</i>     | rs462520           | 56558051         | A/G               | -0.24         | 2.1×10 <sup>-6</sup>       | 0.402        | -0.27         | 2.7×10 <sup>-4</sup>       | 0.396        | -0.22         | 0.0025                     | -0.23         | 2.0×10 <sup>-4</sup>       |  |
| 5         | <i>CTB-118N6.3</i>      | rs150918584        | 116478466        | G/A               | 0.91          | 4.3×10 <sup>-6</sup>       | 0.017        | 0.89          | 0.0018                     | 0.016        | 0.94          | 8.5×10 <sup>-4</sup>       | 0.95          | 6.2×10 <sup>-5</sup>       |  |
| 7         | <i>ASNS</i>             | rs185792646        | 97833130         | T/C               | -1.08         | 6.1×10 <sup>-6</sup>       | 0.011        | -0.90         | 0.0094                     | 0.012        | -1.25         | 1.8×10 <sup>-4</sup>       | -1.01         | 1.1×10 <sup>-4</sup>       |  |
| 7         | <i>MIR29A</i>           | rs34484449         | 130843576        | A/G               | 0.45          | 5.9×10 <sup>-6</sup>       | 0.067        | 0.57          | 9.2×10 <sup>-5</sup>       | 0.074        | 0.34          | 0.012                      | 0.40          | 3.4×10 <sup>-4</sup>       |  |
| 9         | <i>PTPRD</i>            | rs79814862         | 9653882          | C/T               | -0.35         | 6.1×10 <sup>-6</sup>       | 0.126        | -0.27         | 0.012                      | 0.116        | -0.44         | 1.1×10 <sup>-4</sup>       | -0.34         | 2.3×10 <sup>-4</sup>       |  |
| 9         | <i>LCN15</i>            | rs9411227          | 136759203        | A/G               | -0.30         | 1.8×10 <sup>-6</sup>       | 0.196        | -0.28         | 0.0026                     | 0.216        | -0.33         | 2.3×10 <sup>-4</sup>       | -0.32         | 1.6×10 <sup>-5</sup>       |  |
| 10        | <i>BMS1</i>             | rs3128722          | 42884908         | G/T               | -0.22         | 8.3×10 <sup>-6</sup>       | 0.490        | -0.23         | 0.0010                     | 0.487        | -0.22         | 0.0029                     | -0.22         | 2.4×10 <sup>-4</sup>       |  |
| <b>12</b> | <b><i>GRIN2B</i></b>    | <b>rs71457202</b>  | <b>13748154</b>  | <b>A/G</b>        | <b>0.81</b>   | <b>3.8×10<sup>-6</sup></b> | <b>0.028</b> | <b>0.82</b>   | <b>1.9×10<sup>-4</sup></b> | <b>0.015</b> | <b>0.78</b>   | <b>0.0074</b>              | <b>0.99</b>   | <b>1.1×10<sup>-6</sup></b> |  |
| <b>13</b> | <b><i>LINC00559</i></b> | <b>rs145442832</b> | <b>89883465</b>  | <b>T/C</b>        | <b>-0.39</b>  | <b>4.6×10<sup>-6</sup></b> | <b>0.085</b> | <b>-0.37</b>  | <b>0.0033</b>              | <b>0.105</b> | <b>-0.41</b>  | <b>4.8×10<sup>-4</sup></b> | <b>-0.52</b>  | <b>2.2×10<sup>-7</sup></b> |  |
| <b>14</b> | <b><i>TTL5</i></b>      | <b>rs745536628</b> | <b>75760859</b>  | <b>A/AT</b>       | <b>-1.04</b>  | <b>5.4×10<sup>-6</sup></b> | <b>0.012</b> | <b>-0.93</b>  | <b>0.0044</b>              | <b>0.013</b> | <b>-1.14</b>  | <b>4.0×10<sup>-4</sup></b> | <b>-1.21</b>  | <b>6.3×10<sup>-6</sup></b> |  |
| 15        | <i>FBN1</i>             | rs12591575         | 48478822         | T/C               | 0.94          | 1.0×10 <sup>-5</sup>       | 0.013        | 0.94          | 0.0014                     | 0.014        | 0.94          | 0.0025                     | 0.73          | 0.0027                     |  |
| 19        | <i>PVRL2</i>            | rs6857             | 44888997         | T/C               | 0.41          | 7.5×10 <sup>-12</sup>      | 0.309        | 0.35          | 4.7×10 <sup>-6</sup>       | 0.171        | 0.50          | 3.3×10 <sup>-7</sup>       | 0.54          | 3.9×10 <sup>-13</sup>      |  |
| 19        | <i>TOMM40</i>           | rs157582           | 44892962         | T/C               | 0.33          | 8.8×10 <sup>-9</sup>       | 0.356        | 0.34          | 1.2×10 <sup>-5</sup>       | 0.229        | 0.32          | 2.6×10 <sup>-4</sup>       | 0.40          | 1.2×10 <sup>-8</sup>       |  |
| 19        | <i>APOE</i>             | rs429358           | 44908684         | C/T               | 0.50          | 9.1×10 <sup>-17</sup>      | 0.338        | 0.42          | 2.0×10 <sup>-8</sup>       | 0.141        | 0.63          | 8.5×10 <sup>-10</sup>      | 0.60          | 6.9×10 <sup>-15</sup>      |  |

Bolded results indicate single nucleotide variants which were confirmed as a suggestive significance in the sensitivity analysis for people who died 80 years or older.

CHR = chromosome; SNV = single nucleotide variant; NACC = National Alzheimer's Coordinating Center; ADNI = Alzheimer's Disease Neuroimaging Initiative; ROSMAP = Religious Orders Study and Rush Memory and Aging Project; AF = allele frequency

**Supplementary Table 8.** Suggestive significant single nucleotide variants associated with the estimated factor 3 (Lewy body pathology related) score in subjects aged 65 years or older at death and in subjects aged 80 years or older at death as a sensitivity analysis

| CHR      | Gene                   | SNV               | Position        | Effect /reference | ≥ 65 at death |                            |              |              |                      |              |              |                            |               | ≥ 80 at death              |  |
|----------|------------------------|-------------------|-----------------|-------------------|---------------|----------------------------|--------------|--------------|----------------------|--------------|--------------|----------------------------|---------------|----------------------------|--|
|          |                        |                   |                 |                   | Meta-analysis |                            | NACC/ADNI    |              |                      | ROSMAP       |              |                            | Meta-analysis |                            |  |
|          |                        |                   |                 |                   | $\beta$       | P-value                    | AF           | $\beta$      | P-value              | AF           | $\beta$      | P-value                    | $\beta$       | P-value                    |  |
| 2        | <i>NBAS</i>            | rs145028924       | 15232755        | G/A               | 0.92          | 3.2×10 <sup>-6</sup>       | 0.019        | 0.91         | 5.1×10 <sup>-4</sup> | 0.016        | 0.93         | 0.0023                     | 1.05          | 2.5×10 <sup>-5</sup>       |  |
| 4        | <i>HS3ST1</i>          | rs73227761        | 11527873        | A/G               | 0.40          | 6.2×10 <sup>-6</sup>       | 0.096        | 0.40         | 8.9×10 <sup>-4</sup> | 0.087        | 0.41         | 0.0025                     | 0.35          | 8.4×10 <sup>-4</sup>       |  |
| 4        | <i>PABPC4L</i>         | rs13134385        | 133792235       | A/G               | 0.37          | 6.8×10 <sup>-6</sup>       | 0.101        | 0.41         | 6.6×10 <sup>-4</sup> | 0.121        | 0.33         | 0.0033                     | 0.39          | 1.8×10 <sup>-5</sup>       |  |
| <b>6</b> | <b><i>TNFRSF21</i></b> | <b>rs78794444</b> | <b>47311493</b> | <b>T/G</b>        | <b>-0.71</b>  | <b>3.0×10<sup>-6</sup></b> | <b>0.027</b> | <b>-0.41</b> | <b>0.056</b>         | <b>0.031</b> | <b>-1.04</b> | <b>2.8×10<sup>-6</sup></b> | <b>-0.87</b>  | <b>1.5×10<sup>-6</sup></b> |  |
| 7        | <i>ADAP1</i>           | rs112886046       | 947886          | G/A               | -0.58         | 8.5×10 <sup>-6</sup>       | 0.049        | -0.59        | 3.6×10 <sup>-4</sup> | 0.029        | -0.56        | 0.0087                     | -0.60         | 3.9×10 <sup>-5</sup>       |  |
| 7        | <i>EPHB4</i>           | rs75881054        | 100808585       | T/G               | -0.59         | 9.3×10 <sup>-6</sup>       | 0.036        | -0.64        | 8.7×10 <sup>-4</sup> | 0.046        | -0.54        | 0.0036                     | -0.48         | 0.0011                     |  |
| 7        | <i>SLC12A9</i>         | rs1235649855      | 100843125       | A/ACT             | -0.57         | 9.9×10 <sup>-6</sup>       | 0.041        | -0.64        | 4.2×10 <sup>-4</sup> | 0.046        | -0.50        | 0.0076                     | -0.43         | 0.0026                     |  |
| 9        | <i>SH3GL2</i>          | rs60097187        | 17998212        | T/C               | 0.72          | 3.4×10 <sup>-6</sup>       | 0.034        | 0.66         | 0.0012               | 0.025        | 0.83         | 8.6×10 <sup>-4</sup>       | 0.68          | 3.0×10 <sup>-4</sup>       |  |
| 12       | <i>RERGL</i>           | rs117137691       | 17933738        | C/T               | 0.82          | 4.8×10 <sup>-6</sup>       | 0.025        | 0.68         | 0.0032               | 0.017        | 1.04         | 3.3×10 <sup>-4</sup>       | 0.72          | 3.9×10 <sup>-4</sup>       |  |
| 12       | <i>SLC5A8</i>          | rs79398551        | 101212178       | A/C               | -0.50         | 3.4×10 <sup>-6</sup>       | 0.057        | -0.50        | 0.0011               | 0.065        | -0.50        | 0.0011                     | -0.47         | 1.1×10 <sup>-4</sup>       |  |
| 12       | <i>LOC101928416</i>    | rs28677872        | 132408886       | G/A               | 0.24          | 5.9×10 <sup>-6</sup>       | 0.422        | 0.24         | 7.2×10 <sup>-4</sup> | 0.436        | 0.23         | 0.0029                     | 0.23          | 1.1×10 <sup>-4</sup>       |  |
| 13       | <i>FLT3</i>            | rs117990166       | 28013358        | T/C               | 0.88          | 5.0×10 <sup>-6</sup>       | 0.013        | 1.12         | 3.1×10 <sup>-4</sup> | 0.024        | 0.72         | 0.0035                     | 0.80          | 1.6×10 <sup>-4</sup>       |  |
| 13       | <i>MIR5007</i>         | rs73202898        | 54904307        | A/G               | 0.60          | 8.2×10 <sup>-6</sup>       | 0.036        | 0.75         | 6.2×10 <sup>-5</sup> | 0.036        | 0.43         | 0.027                      | 0.49          | 0.0011                     |  |
| 14       | <i>LOC642426</i>       | rs28394359        | 18651775        | G/A               | 0.98          | 9.4×10 <sup>-6</sup>       | 0.013        | 0.97         | 0.0025               | 0.016        | 0.98         | 0.0014                     | 0.94          | 1.3×10 <sup>-4</sup>       |  |
| 16       | <i>PLLP</i>            | rs12929504        | 57320578        | C/T               | -0.26         | 8.4×10 <sup>-6</sup>       | 0.295        | -0.30        | 1.4×10 <sup>-4</sup> | 0.258        | -0.21        | 0.018                      | -0.26         | 1.0×10 <sup>-4</sup>       |  |
| 16       | <i>PLCG2</i>           | rs146614066       | 81977696        | A/G               | 1.03          | 5.8×10 <sup>-6</sup>       | 0.013        | 1.11         | 3.2×10 <sup>-4</sup> | 0.013        | 0.93         | 0.0061                     | 0.85          | 0.0010                     |  |
| 19       | <i>LINC01233</i>       | rs116885812       | 22545387        | G/A               | 1.15          | 9.7×10 <sup>-7</sup>       | 0.011        | 1.03         | 7.3×10 <sup>-4</sup> | 0.011        | 1.31         | 3.9×10 <sup>-4</sup>       | 1.44          | 4.0×10 <sup>-5</sup>       |  |

Bolded result indicates a single nucleotide variant which was confirmed as a suggestive significance in the sensitivity analysis for people who died 80 years or older.

CHR = chromosome; SNV = single nucleotide variant; NACC = National Alzheimer's Coordinating Center; ADNI = Alzheimer's Disease Neuroimaging Initiative; ROSMAP = Religious Orders Study and Rush Memory and Aging Project; AF = allele frequency



**Supplementary Table 9.** Quality score of significant and suggestive significant single nucleotide variants associated with the estimated factor 1 (TDP-43 and hippocampal sclerosis related) score

| CHR | Gene            | SNV         | Position  | Location   | FILTER | MQ    | FS    | SOR   | QD    | P_HWE                |
|-----|-----------------|-------------|-----------|------------|--------|-------|-------|-------|-------|----------------------|
| 1   | <i>KAZN</i>     | rs72643142  | 14148707  | Intron     | PASS   | 60    | 0     | 0.716 | 15.09 | 0.072                |
| 1   | <i>LPHN2</i>    | rs17472472  | 82013634  | Intergenic | PASS   | .     | 0     | 0.704 | 17.96 | 1.0×10 <sup>-5</sup> |
| 2   | <i>KLHL29</i>   | rs55869619  | 23200869  | Promoter   | PASS   | 60    | 0     | 0.715 | 14.85 | 4.0×10 <sup>-5</sup> |
| 2   | <i>DDX18</i>    | rs554736674 | 116872180 | Intergenic | PASS   | 42.32 | 0     | 0.758 | 13.83 | 1                    |
| 4   | <i>MSANTD1</i>  | rs362285    | 3256594   | 3' UTR     | PASS   | 60    | 0.516 | 0.671 | 14.55 | 7.5×10 <sup>-8</sup> |
| 5   | <i>ARHGEF28</i> | rs80190672  | 73973002  | Intergenic | PASS   | 60    | 0     | 0.714 | 14.25 | 0.16                 |
| 7   | <i>TMEM106B</i> | rs10950392  | 12223912  | Intron     | PASS   | .     | 0     | 0.682 | 28.77 | 2.1×10 <sup>-6</sup> |
| 8   | <i>TMEM68</i>   | rs28610182  | 55751840  | Promoter   | PASS   | 60    | 0     | 0.695 | 16.3  | 2.3×10 <sup>-6</sup> |
| 9   | <i>RNU6ATAC</i> | rs147951468 | 134200170 | Intergenic | PASS   | 60    | 0.517 | 0.661 | 14.31 | 0.0033               |
| 12  | <i>CD9</i>      | rs140383201 | 6164511   | Intergenic | PASS   | 59.96 | 0     | 0.701 | 13.22 | 0.0062               |
| 12  | <i>MGAT4C</i>   | rs11615307  | 87047504  | Intergenic | PASS   | 60    | 0     | 0.696 | 15.17 | 0.0087               |
| 15  | <i>UNC13C</i>   | rs141108370 | 54631819  | Intergenic | PASS   | 60    | 0     | 0.701 | 13.86 | 1                    |
| 16  | <i>PARN</i>     | rs77639069  | 14418707  | Promoter   | PASS   | 59.83 | 0     | 0.703 | 14.54 | 1.7×10 <sup>-4</sup> |
| 18  | <i>MIR4318</i>  | rs77579757  | 37626039  | Intron     | PASS   | 59.98 | 0     | 0.695 | 14.35 | 1.4×10 <sup>-4</sup> |
| 19  | <i>SDHAF1</i>   | rs17706479  | 35994474  | Promoter   | PASS   | 60    | 0     | 0.68  | 15.21 | 0.0048               |
| 19  | <i>CLIP3</i>    | rs113229403 | 36021913  | Intron     | PASS   | 59.95 | 0     | 0.668 | 15.11 | 0.0037               |

CHR = chromosome; SNV = single nucleotide variant; MQ = RMS mapping quality; FS = Phred-scaled p-value using Fisher's exact test to detect strand bias; SOR = symmetric odds ratio of 2×2 contingency table to detect strand bias; QD = variant confidence/quality by depth; P\_HWE = p-value from Hardy-Weinberg equilibrium test

**Supplementary Table 10.** Quality score of significant and suggestive significant single nucleotide variants associated with the estimated factor 2 (Alzheimer's disease neuropathologic change related) score

| CHR | Gene                | SNV         | Position  | Location   | FILTER | MQ    | FS    | SOR   | QD    | P_HWE                |
|-----|---------------------|-------------|-----------|------------|--------|-------|-------|-------|-------|----------------------|
| 1   | <i>C1orf185</i>     | rs72692278  | 51129361  | Intron     | PASS   | 60    | 0     | 0.672 | 14.12 | 9.6×10 <sup>-4</sup> |
| 1   | <i>LRRC7</i>        | rs79165012  | 69428372  | Intergenic | PASS   | 60    | 0     | 0.717 | 13.68 | 1                    |
| 1   | <i>ZNF281</i>       | rs188482877 | 200431363 | Intron     | PASS   | 59.99 | 0.521 | 0.756 | 14.33 | 0.37                 |
| 4   | <i>SPINK2</i>       | rs34986806  | 56843293  | Intergenic | PASS   | 60.02 | 0.528 | 0.622 | 13.78 | 0.47                 |
| 5   | <i>PARP8</i>        | rs149949227 | 50746672  | Intron     | PASS   | 60    | 0     | 0.677 | 13.94 | 0.39                 |
| 5   | <i>LOC101928448</i> | rs462520    | 56558051  | Intron     | PASS   | .     | 0     | 0.703 | 23.26 | 0.79                 |
| 5   | <i>CTB-118N6.3</i>  | rs150918584 | 116478466 | Intron     | PASS   | 60    | 0     | 0.687 | 13.07 | 0.044                |
| 7   | <i>ASNS</i>         | rs185792646 | 97833130  | Intergenic | PASS   | 59.99 | 0     | 0.735 | 14.27 | 0.12                 |
| 7   | <i>MIR29A</i>       | rs34484449  | 130843576 | Promoter   | PASS   | 60.23 | 0.525 | 0.661 | 15.05 | 0.22                 |
| 9   | <i>PTPRD</i>        | rs79814862  | 9653882   | Intron     | PASS   | 60    | 0     | 0.707 | 14.66 | 5.3×10 <sup>-5</sup> |
| 9   | <i>LCN15</i>        | rs9411227   | 136759203 | Promoter   | PASS   | 60.08 | 0     | 0.729 | 16.98 | 0.0039               |
| 10  | <i>BMS1</i>         | rs3128722   | 42884908  | Intergenic | PASS   | .     | 0     | 0.692 | 21.29 | 0.045                |
| 12  | <i>GRIN2B</i>       | rs71457202  | 13748154  | Intron     | PASS   | 60    | 0     | 0.72  | 14.14 | 0.73                 |
| 13  | <i>LINC00559</i>    | rs145442832 | 89883465  | Intergenic | PASS   | 59.98 | 0     | 0.673 | 15.47 | 0.064                |
| 14  | <i>TTLL5</i>        | rs745536628 | 75760859  | Intron     | PASS   | 60.07 | 0.521 | 0.762 | 18.94 | 0.038                |
| 15  | <i>FBNI</i>         | rs12591575  | 48478822  | Intron     | PASS   | 60    | 0     | 0.68  | 14.84 | 5.1×10 <sup>-7</sup> |
| 19  | <i>PVRL2</i>        | rs6857      | 44888997  | 3' UTR     | PASS   | 59.24 | 0.575 | 0.788 | 16.23 | 0.030                |
| 19  | <i>TOMM40</i>       | rs157582    | 44892962  | Promoter   | PASS   | .     | 0     | 0.692 | 18.82 | 6.0×10 <sup>-6</sup> |
| 19  | <i>APOE</i>         | rs429358    | 44908684  | Coding     | PASS   | .     | 0     | 0.688 | 16.75 | 0.38                 |

CHR = chromosome; SNV = single nucleotide variant; MQ = RMS mapping quality; FS = Phred-scaled p-value using Fisher's exact test to detect strand bias; SOR = symmetric odds ratio of 2×2 contingency table to detect strand bias; QD = variant confidence/quality by depth; P\_HWE = p-value from Hardy-Weinberg equilibrium test

**Supplementary Table 11.** Quality score of significant and suggestive significant single nucleotide variants associated with the estimated factor 3 (Lewy body pathology related) score

| CHR | Gene                | SNV          | Position  | Location   | FILTER                          | MQ    | FS     | SOR   | QD    | P_HWE                |
|-----|---------------------|--------------|-----------|------------|---------------------------------|-------|--------|-------|-------|----------------------|
| 2   | <i>NBAS</i>         | rs145028924  | 15232755  | -          | PASS                            | 60.04 | 0      | 0.683 | 13.26 | 0.28                 |
| 4   | <i>HS3ST1</i>       | rs73227761   | 11527873  | -          | PASS                            | 60    | 0      | 0.701 | 14.79 | 4.3×10 <sup>-4</sup> |
| 4   | <i>PABPC4L</i>      | rs13134385   | 133792235 | Intergenic | PASS                            | 60.04 | 0.532  | 0.748 | 14.72 | 0.0015               |
| 6   | <i>TNFRSF21</i>     | rs78794444   | 47311493  | Promoter   | PASS                            | 60    | 0.517  | 0.65  | 14.32 | 0.12                 |
| 7   | <i>ADAP1</i>        | rs112886046  | 947886    | Intron     | PASS                            | 60.01 | 0.522  | 0.621 | 13.8  | 0.25                 |
| 7   | <i>EPHB4</i>        | rs75881054   | 100808585 | Promoter   | PASS                            | 60    | 0      | 0.663 | 14.37 | 0.0019               |
| 7   | <i>SLC12A9</i>      | rs1235649855 | 100843125 | Intron     | PASS                            | 59.94 | 0      | 0.686 | 19.59 | 0.17                 |
| 9   | <i>SH3GL2</i>       | rs60097187   | 17998212  | Intron     | PASS                            | 60    | 0      | 0.694 | 15.27 | 5.3×10 <sup>-5</sup> |
| 12  | <i>RERGL</i>        | rs117137691  | 17933738  | Intergenic | PASS                            | 60.11 | 0      | 0.715 | 13.51 | 1                    |
| 12  | <i>SLC5A8</i>       | rs79398551   | 101212178 | Promoter   | PASS                            | 60    | 0      | 0.679 | 14.98 | 1.4×10 <sup>-4</sup> |
| 12  | <i>LOC101928416</i> | rs28677872   | 132408886 | Intergenic | PASS                            | .     | 0      | 0.682 | 19.65 | 0.42                 |
| 13  | <i>FLT3</i>         | rs117990166  | 28013358  | -          | PASS                            | 60    | 0.516  | 0.678 | 13.82 | 0.57                 |
| 13  | <i>MIR5007</i>      | rs73202898   | 54904307  | Intergenic | PASS                            | 60    | 0      | 0.688 | 14.25 | 0.70                 |
| 14  | <i>LOC642426</i>    | rs28394359   | 18651775  | Intergenic | VQSRTTranche<br>SNP99.80to99.90 | 55.57 | 45.651 | 3.211 | 3.41  | 0.063                |
| 16  | <i>PLLP</i>         | rs12929504   | 57320578  | Promoter   | PASS                            | .     | 0.534  | 0.71  | 18.27 | 2.2×10 <sup>-6</sup> |
| 16  | <i>PLCG2</i>        | rs146614066  | 81977696  | Intergenic | PASS                            | 58.95 | 0      | 0.73  | 17.16 | 8.9×10 <sup>-4</sup> |
| 19  | <i>LINC01233</i>    | rs116885812  | 22545387  | Intergenic | PASS                            | 60    | 0      | 0.689 | 14.2  | 0.019                |

CHR = chromosome; SNV = single nucleotide variant; MQ = RMS mapping quality; FS = Phred-scaled p-value using Fisher's exact test to detect strand bias; SOR = symmetric odds ratio of 2×2 contingency table to detect strand bias; QD = variant confidence/quality by depth; P\_HWE = p-value from Hardy-Weinberg equilibrium test

**Supplementary Table 12.** Results on colocalization analyses from multi resources for significant and suggestive significant single nucleotide variants associated with the estimated factor 1 (TDP-43 and hippocampal sclerosis) score in subjects aged 65 years or older at death

| Chr | Gene            | SNV        | Source | Gene expression | Tissue                     | $\hat{\beta}^*$ | P-value               | PPH4             |                  |                  |
|-----|-----------------|------------|--------|-----------------|----------------------------|-----------------|-----------------------|------------------|------------------|------------------|
|     |                 |            |        |                 |                            |                 |                       | 10 <sup>-4</sup> | 10 <sup>-5</sup> | 10 <sup>-6</sup> |
| 1   | <i>LPHN2</i>    | rs17472472 | GTEEx  | <i>ADGRL2</i>   | Muscle Skeletal            | -0.20           | 3.4×10 <sup>-8</sup>  | 0.86             | 0.39             | 0.059            |
| 4   | <i>MSANTD1</i>  | rs362285   | TOPMed | <i>MSANTD1</i>  | Whole blood                | -0.23           | 1.1×10 <sup>-8</sup>  | 0.25             | 0.032            | 0.0033           |
| 7   | <i>TMEM106B</i> | rs10950392 | GTEEx  | <i>TMEM106B</i> | Adrenal Gland              | 0.17            | 1.4×10 <sup>-7</sup>  | 0.99             | 0.95             | 0.66             |
| 7   | <i>TMEM106B</i> | rs10950392 | GTEEx  | <i>TMEM106B</i> | Artery Tibial              | 0.11            | 4.1×10 <sup>-7</sup>  | 0.99             | 0.89             | 0.46             |
| 7   | <i>TMEM106B</i> | rs10950392 | GTEEx  | <i>TMEM106B</i> | Colon Transverse           | 0.14            | 1.4×10 <sup>-6</sup>  | 0.99             | 0.95             | 0.64             |
| 7   | <i>TMEM106B</i> | rs10950392 | GTEEx  | <i>TMEM106B</i> | Esophagus Muscularis       | 0.12            | 1.8×10 <sup>-7</sup>  | 0.99             | 0.94             | 0.63             |
| 7   | <i>TMEM106B</i> | rs10950392 | GTEEx  | <i>TMEM106B</i> | Heart Atrial Appendage     | 0.16            | 1.1×10 <sup>-8</sup>  | 0.53             | 0.10             | 0.011            |
| 7   | <i>TMEM106B</i> | rs10950392 | GTEEx  | <i>TMEM106B</i> | Heart Left Ventricle       | 0.14            | 2.4×10 <sup>-8</sup>  | 0.99             | 0.90             | 0.49             |
| 7   | <i>TMEM106B</i> | rs10950392 | GTEEx  | <i>TMEM106B</i> | Whole Blood                | 0.23            | 3.8×10 <sup>-23</sup> | >0.99            | 0.96             | 0.68             |
| 7   | <i>TMEM106B</i> | rs10950392 | TOPMed | <i>TMEM106B</i> | Lung                       | -0.07           | 8.5×10 <sup>-17</sup> | 0.40             | 0.063            | 0.0066           |
| 7   | <i>TMEM106B</i> | rs10950392 | TOPMed | <i>TMEM106B</i> | Monocyte                   | -0.17           | 7.6×10 <sup>-12</sup> | 0.95             | 0.64             | 0.15             |
| 7   | <i>TMEM106B</i> | rs10950392 | TOPMed | <i>TMEM106B</i> | Nasal epithelial           | -0.12           | 1.5×10 <sup>-6</sup>  | 0.82             | 0.32             | 0.044            |
| 7   | <i>TMEM106B</i> | rs10950392 | TOPMed | <i>TMEM106B</i> | T cell                     | 0.12            | 3.9×10 <sup>-10</sup> | 0.97             | 0.76             | 0.24             |
| 7   | <i>TMEM106B</i> | rs10950392 | TOPMed | <i>TMEM106B</i> | Whole blood                | -0.07           | 3.6×10 <sup>-76</sup> | 0.93             | 0.59             | 0.13             |
| 8   | <i>TMEM68</i>   | rs28610182 | GTEEx  | <i>LYN</i>      | Artery Aorta               | -0.18           | 1.1×10 <sup>-6</sup>  | 0.94             | 0.59             | 0.13             |
| 8   | <i>TMEM68</i>   | rs28610182 | GTEEx  | <i>TMEM68</i>   | Brain Frontal Cortex BA9   | 0.42            | 1.0×10 <sup>-7</sup>  | >0.99            | 0.99             | 0.91             |
| 8   | <i>TMEM68</i>   | rs28610182 | GTEEx  | <i>TMEM68</i>   | Brain Hypothalamus         | 0.48            | 3.3×10 <sup>-8</sup>  | >0.99            | 0.99             | 0.89             |
| 8   | <i>TMEM68</i>   | rs28610182 | GTEEx  | <i>TMEM68</i>   | Cells Cultured fibroblasts | 0.26            | 4.1×10 <sup>-9</sup>  | >0.99            | 0.99             | 0.93             |
| 8   | <i>TMEM68</i>   | rs28610182 | GTEEx  | <i>TMEM68</i>   | Colon Transverse           | 0.21            | 5.5×10 <sup>-7</sup>  | >0.99            | 0.99             | 0.90             |
| 8   | <i>TMEM68</i>   | rs28610182 | GTEEx  | <i>TMEM68</i>   | Esophagus Mucosa           | 0.25            | 2.9×10 <sup>-11</sup> | >0.99            | 0.99             | 0.93             |
| 8   | <i>TMEM68</i>   | rs28610182 | GTEEx  | <i>LYN</i>      | Esophagus Muscularis       | -0.31           | 2.3×10 <sup>-12</sup> | 0.87             | 0.40             | 0.062            |
| 8   | <i>TMEM68</i>   | rs28610182 | GTEEx  | <i>TMEM68</i>   | Nerve Tibial               | 0.20            | 1.5×10 <sup>-6</sup>  | >0.99            | 0.99             | 0.89             |
| 8   | <i>TMEM68</i>   | rs28610182 | GTEEx  | <i>TMEM68</i>   | Thyroid                    | 0.29            | 4.4×10 <sup>-11</sup> | 0.14             | 0.016            | 0.0016           |

|    |               |            |        |               |                                 |       |                       |       |        |                      |
|----|---------------|------------|--------|---------------|---------------------------------|-------|-----------------------|-------|--------|----------------------|
| 8  | <i>TMEM68</i> | rs28610182 | ROSMAP | <i>TMEM68</i> | Brain Prefrontal Cortex         | 0.10  | $4.4 \times 10^{-19}$ | >0.99 | 0.99   | 0.87                 |
| 8  | <i>TMEM68</i> | rs28610182 | TOPMed | <i>TMEM68</i> | Lung                            | 0.10  | $4.2 \times 10^{-10}$ | 0.34  | 0.049  | 0.0052               |
| 8  | <i>TMEM68</i> | rs28610182 | TOPMed | <i>TMEM68</i> | Nasal epithelial                | 0.16  | $3.5 \times 10^{-11}$ | >0.99 | 0.99   | 0.91                 |
| 8  | <i>TMEM68</i> | rs28610182 | TOPMed | <i>TMEM68</i> | PBMC                            | 0.12  | $2.7 \times 10^{-8}$  | 0.069 | 0.0074 | $7.5 \times 10^{-4}$ |
| 8  | <i>TMEM68</i> | rs28610182 | TOPMed | <i>TMEM68</i> | Whole blood                     | 0.08  | $1.0 \times 10^{-19}$ | 0.076 | 0.0082 | $8.2 \times 10^{-4}$ |
| 8  | <i>TMEM68</i> | rs28610182 | TOPMed | <i>TGS1</i>   | Whole blood                     | 0.06  | $8.1 \times 10^{-12}$ | 0.078 | 0.0084 | $8.5 \times 10^{-4}$ |
| 8  | <i>TMEM68</i> | rs28610182 | TOPMed | <i>LYN</i>    | Whole blood                     | -0.04 | $6.7 \times 10^{-29}$ | 0.046 | 0.0048 | $4.8 \times 10^{-4}$ |
| 16 | <i>PARN</i>   | rs77639069 | TOPMed | <i>NPIPA1</i> | Lung                            | 0.41  | $1.3 \times 10^{-7}$  | 0.31  | 0.044  | 0.0045               |
| 16 | <i>PARN</i>   | rs77639069 | TOPMed | <i>NPIPA5</i> | Lung                            | -0.59 | $1.8 \times 10^{-7}$  | 0.32  | 0.045  | 0.0047               |
| 16 | <i>PARN</i>   | rs77639069 | TOPMed | <i>NPIPA1</i> | Whole blood                     | 0.28  | $6.9 \times 10^{-12}$ | 0.30  | 0.042  | 0.0043               |
| 16 | <i>PARN</i>   | rs77639069 | TOPMed | <i>NPIPP1</i> | Whole blood                     | 0.17  | $2.6 \times 10^{-8}$  | 0.61  | 0.13   | 0.015                |
| 19 | <i>SDHAF1</i> | rs17706479 | GTEEx  | <i>CLIP3</i>  | Adipose Subcutaneous            | 0.23  | $2.9 \times 10^{-6}$  | 0.87  | 0.41   | 0.065                |
| 19 | <i>SDHAF1</i> | rs17706479 | GTEEx  | <i>CLIP3</i>  | Artery Tibial                   | 0.23  | $1.3 \times 10^{-8}$  | 0.87  | 0.40   | 0.062                |
| 19 | <i>SDHAF1</i> | rs17706479 | GTEEx  | <i>TBCB</i>   | Heart Left Ventricle            | -0.25 | $3.3 \times 10^{-6}$  | 0.98  | 0.81   | 0.30                 |
| 19 | <i>SDHAF1</i> | rs17706479 | GTEEx  | <i>WDR62</i>  | Heart Left Ventricle            | -0.20 | $1.4 \times 10^{-6}$  | 0.87  | 0.40   | 0.062                |
| 19 | <i>SDHAF1</i> | rs17706479 | GTEEx  | <i>WDR62</i>  | Muscle Skeletal                 | -0.33 | $4.8 \times 10^{-23}$ | 0.87  | 0.41   | 0.065                |
| 19 | <i>SDHAF1</i> | rs17706479 | GTEEx  | <i>TBCB</i>   | Muscle Skeletal                 | -0.24 | $1.1 \times 10^{-14}$ | 0.87  | 0.41   | 0.064                |
| 19 | <i>SDHAF1</i> | rs17706479 | GTEEx  | <i>WDR62</i>  | Skin Not Sun Exposed Suprapubic | 0.42  | $1.4 \times 10^{-16}$ | 0.87  | 0.40   | 0.063                |
| 19 | <i>SDHAF1</i> | rs17706479 | GTEEx  | <i>CLIP3</i>  | Skin Not Sun Exposed Suprapubic | 0.16  | $9.7 \times 10^{-6}$  | 0.87  | 0.40   | 0.063                |
| 19 | <i>SDHAF1</i> | rs17706479 | GTEEx  | <i>THAP8</i>  | Skin Not Sun Exposed Suprapubic | 0.20  | $1.4 \times 10^{-6}$  | 0.09  | 0.010  | 0.0010               |
| 19 | <i>SDHAF1</i> | rs17706479 | GTEEx  | <i>WDR62</i>  | Skin Sun Exposed Lower leg      | 0.40  | $8.4 \times 10^{-18}$ | 0.87  | 0.40   | 0.062                |
| 19 | <i>SDHAF1</i> | rs17706479 | GTEEx  | <i>THAP8</i>  | Skin Sun Exposed Lower leg      | 0.23  | $2.2 \times 10^{-9}$  | 0.09  | 0.010  | 0.0010               |
| 19 | <i>SDHAF1</i> | rs17706479 | GTEEx  | <i>CLIP3</i>  | Thyroid                         | 0.23  | $1.4 \times 10^{-9}$  | 0.87  | 0.40   | 0.062                |
| 19 | <i>SDHAF1</i> | rs17706479 | TOPMed | <i>CLIP3</i>  | Lung                            | 0.18  | $4.8 \times 10^{-23}$ | 0.87  | 0.39   | 0.061                |
| 19 | <i>SDHAF1</i> | rs17706479 | TOPMed | <i>SDHAF1</i> | Lung                            | -0.10 | $1.3 \times 10^{-7}$  | >0.99 | 0.99   | 0.93                 |
| 19 | <i>SDHAF1</i> | rs17706479 | TOPMed | <i>CLIP3</i>  | Nasal epithelial                | 0.52  | $3.3 \times 10^{-7}$  | 0.09  | 0.010  | 0.0010               |

|    |               |            |        |                |             |       |                       |       |        |                      |
|----|---------------|------------|--------|----------------|-------------|-------|-----------------------|-------|--------|----------------------|
| 19 | <i>SDHAF1</i> | rs17706479 | TOPMed | <i>WDR62</i>   | PBMC        | -0.19 | $9.5 \times 10^{-7}$  | 0.87  | 0.40   | 0.062                |
| 19 | <i>SDHAF1</i> | rs17706479 | TOPMed | <i>CLIP3</i>   | PBMC        | 0.44  | $2.4 \times 10^{-15}$ | 0.87  | 0.40   | 0.063                |
| 19 | <i>SDHAF1</i> | rs17706479 | TOPMed | <i>CLIP3</i>   | T cell      | 0.60  | $3.5 \times 10^{-8}$  | 0.88  | 0.42   | 0.068                |
| 19 | <i>SDHAF1</i> | rs17706479 | TOPMed | <i>SDHAF1</i>  | Whole blood | -0.07 | $3.8 \times 10^{-21}$ | >0.99 | 0.99   | 0.94                 |
| 19 | <i>SDHAF1</i> | rs17706479 | TOPMed | <i>POLR2I</i>  | Whole blood | -0.05 | $2.3 \times 10^{-17}$ | 0.07  | 0.0075 | $7.6 \times 10^{-4}$ |
| 19 | <i>SDHAF1</i> | rs17706479 | TOPMed | <i>CLIP3</i>   | Whole blood | 0.28  | $6.2 \times 10^{-44}$ | 0.87  | 0.40   | 0.063                |
| 19 | <i>SDHAF1</i> | rs17706479 | TOPMed | <i>U2AF1L4</i> | Whole blood | 0.06  | $1.0 \times 10^{-6}$  | 0.49  | 0.087  | 0.0094               |

\* The effect allele is the same as that shown in Supplementary Table 5.

PPH4 = posterior probability for a hypothesis that both traits are associated and share the same single nucleotide variants

**Supplementary Table 13.** Results on colocalization analyses from multi resources for significant and suggestive significant single nucleotide variants associated with the estimated factor 2 (Alzheimer’s disease neuropathologic change related) score in subjects aged 65 years or older at death

| Chr | Gene            | SNV        | Source | Gene expression  | Tissue                         | $\hat{\beta}$ | P-value               | PPH4      |           |           |
|-----|-----------------|------------|--------|------------------|--------------------------------|---------------|-----------------------|-----------|-----------|-----------|
|     |                 |            |        |                  |                                |               |                       | $10^{-4}$ | $10^{-5}$ | $10^{-6}$ |
| 1   | <i>C1orf185</i> | rs72692278 | TOPMed | <i>TTC39A</i>    | Lung                           | -0.19         | $1.1 \times 10^{-8}$  | 0.66      | 0.17      | 0.019     |
| 1   | <i>C1orf185</i> | rs72692278 | TOPMed | <i>TTC39A</i>    | Nasal epithelial               | -0.41         | $7.9 \times 10^{-6}$  | 0.68      | 0.18      | 0.021     |
| 1   | <i>C1orf185</i> | rs72692278 | TOPMed | <i>NRDC</i>      | Whole blood                    | -0.06         | $6.7 \times 10^{-8}$  | 0.75      | 0.23      | 0.029     |
| 4   | <i>SPINK2</i>   | rs34986806 | TOPMed | <i>POLR2B</i>    | Lung                           | 0.16          | $1.5 \times 10^{-6}$  | 0.45      | 0.076     | 0.0082    |
| 7   | <i>MIR29A</i>   | rs34484449 | TOPMed | ENSG00000285106  | Whole blood                    | -0.12         | $1.9 \times 10^{-11}$ | 0.26      | 0.033     | 0.0034    |
| 10  | <i>BMS1</i>     | rs3128722  | GTEEx  | <i>LINC00839</i> | Adipose<br>Subcutaneous        | 0.34          | $1.6 \times 10^{-10}$ | 0.18      | 0.022     | 0.0022    |
| 10  | <i>BMS1</i>     | rs3128722  | GTEEx  | <i>ZNF33B</i>    | Adipose<br>Subcutaneous        | -0.22         | $1.3 \times 10^{-12}$ | 0.74      | 0.22      | 0.028     |
| 10  | <i>BMS1</i>     | rs3128722  | GTEEx  | <i>LOC441666</i> | Adipose<br>Subcutaneous        | 0.32          | $9.1 \times 10^{-8}$  | 0.23      | 0.029     | 0.0030    |
| 10  | <i>BMS1</i>     | rs3128722  | GTEEx  | <i>LINC00839</i> | Adipose Visceral<br>Omentum    | 0.29          | $4.7 \times 10^{-7}$  | 0.33      | 0.047     | 0.0049    |
| 10  | <i>BMS1</i>     | rs3128722  | GTEEx  | <i>ZNF33B</i>    | Adipose Visceral<br>Omentum    | -0.14         | $7.2 \times 10^{-8}$  | 0.77      | 0.25      | 0.033     |
| 10  | <i>BMS1</i>     | rs3128722  | GTEEx  | <i>CCNYL2</i>    | Artery Aorta                   | 0.57          | $2.0 \times 10^{-12}$ | 0.53      | 0.10      | 0.011     |
| 10  | <i>BMS1</i>     | rs3128722  | GTEEx  | <i>LINC00839</i> | Artery Aorta                   | 0.46          | $7.8 \times 10^{-10}$ | 0.53      | 0.10      | 0.011     |
| 10  | <i>BMS1</i>     | rs3128722  | GTEEx  | <i>CCNYL2</i>    | Artery Tibial                  | 0.49          | $1.6 \times 10^{-15}$ | 0.57      | 0.12      | 0.013     |
| 10  | <i>BMS1</i>     | rs3128722  | GTEEx  | <i>LINC00839</i> | Artery Tibial                  | 0.46          | $9.8 \times 10^{-16}$ | 0.33      | 0.047     | 0.0049    |
| 10  | <i>BMS1</i>     | rs3128722  | GTEEx  | <i>ZNF33B</i>    | Artery Tibial                  | -0.13         | $1.1 \times 10^{-7}$  | 0.77      | 0.25      | 0.033     |
| 10  | <i>BMS1</i>     | rs3128722  | GTEEx  | <i>LOC441666</i> | Artery Tibial                  | 0.24          | $5.7 \times 10^{-6}$  | 0.23      | 0.028     | 0.0029    |
| 10  | <i>BMS1</i>     | rs3128722  | GTEEx  | ENSG00000259869  | Artery Tibial                  | -0.31         | $9.5 \times 10^{-7}$  | 0.99      | 0.95      | 0.65      |
| 10  | <i>BMS1</i>     | rs3128722  | GTEEx  | <i>LINC00839</i> | Brain Caudate basal<br>ganglia | 0.40          | $4.1 \times 10^{-6}$  | 0.95      | 0.65      | 0.16      |
| 10  | <i>BMS1</i>     | rs3128722  | GTEEx  | <i>LOC441666</i> | Brain Caudate basal<br>ganglia | 0.35          | $8.6 \times 10^{-6}$  | 0.26      | 0.035     | 0.0036    |
| 10  | <i>BMS1</i>     | rs3128722  | GTEEx  | <i>BMS1</i>      | Brain Cerebellum               | -0.42         | $1.3 \times 10^{-7}$  | 0.99      | 0.94      | 0.60      |
| 10  | <i>BMS1</i>     | rs3128722  | GTEEx  | <i>BMS1</i>      | Brain Cortex                   | -0.32         | $2.1 \times 10^{-6}$  | 0.77      | 0.25      | 0.032     |
| 10  | <i>BMS1</i>     | rs3128722  | GTEEx  | <i>LINC00839</i> | Brain Cortex                   | 0.40          | $4.0 \times 10^{-6}$  | 0.51      | 0.093     | 0.010     |

|    |             |           |       |                  |                                             |       |                       |      |       |        |
|----|-------------|-----------|-------|------------------|---------------------------------------------|-------|-----------------------|------|-------|--------|
| 10 | <i>BMS1</i> | rs3128722 | GTEEx | <i>LOC441666</i> | Brain Cortex                                | 0.49  | $4.0 \times 10^{-6}$  | 0.23 | 0.029 | 0.0030 |
| 10 | <i>BMS1</i> | rs3128722 | GTEEx | <i>BMS1</i>      | Brain Frontal Cortex<br>BA9                 | -0.29 | $6.2 \times 10^{-6}$  | 0.58 | 0.12  | 0.014  |
| 10 | <i>BMS1</i> | rs3128722 | GTEEx | <i>LINC00839</i> | Brain Nucleus<br>accumbens basal<br>ganglia | 0.52  | $3.0 \times 10^{-8}$  | 0.98 | 0.85  | 0.37   |
| 10 | <i>BMS1</i> | rs3128722 | GTEEx | <i>LOC441666</i> | Brain Putamen basal<br>ganglia              | 0.49  | $3.6 \times 10^{-6}$  | 0.26 | 0.035 | 0.0036 |
| 10 | <i>BMS1</i> | rs3128722 | GTEEx | <i>LINC00839</i> | Breast Mammary<br>Tissue                    | 0.37  | $1.3 \times 10^{-11}$ | 0.33 | 0.047 | 0.0049 |
| 10 | <i>BMS1</i> | rs3128722 | GTEEx | <i>CCNYL2</i>    | Cells Cultured<br>fibroblasts               | 0.37  | $4.4 \times 10^{-8}$  | 0.25 | 0.033 | 0.0034 |
| 10 | <i>BMS1</i> | rs3128722 | GTEEx | <i>LINC00839</i> | Cells Cultured<br>fibroblasts               | 0.45  | $9.1 \times 10^{-11}$ | 0.17 | 0.021 | 0.0021 |
| 10 | <i>BMS1</i> | rs3128722 | GTEEx | <i>ZNF33B</i>    | Cells Cultured<br>fibroblasts               | -0.15 | $8.4 \times 10^{-7}$  | 0.77 | 0.25  | 0.033  |
| 10 | <i>BMS1</i> | rs3128722 | GTEEx | <i>LOC441666</i> | Cells Cultured<br>fibroblasts               | 0.40  | $2.9 \times 10^{-9}$  | 0.24 | 0.031 | 0.0032 |
| 10 | <i>BMS1</i> | rs3128722 | GTEEx | <i>LINC00839</i> | Esophagus<br>Gastroesophageal<br>Junction   | 0.43  | $2.1 \times 10^{-7}$  | 0.54 | 0.10  | 0.012  |
| 10 | <i>BMS1</i> | rs3128722 | GTEEx | <i>LINC00839</i> | Esophagus Mucosa                            | 0.34  | $2.3 \times 10^{-7}$  | 0.30 | 0.041 | 0.0043 |
| 10 | <i>BMS1</i> | rs3128722 | GTEEx | <i>LINC00839</i> | Esophagus<br>Muscularis                     | 0.55  | $5.4 \times 10^{-15}$ | 0.56 | 0.11  | 0.012  |
| 10 | <i>BMS1</i> | rs3128722 | GTEEx | <i>ZNF33B</i>    | Esophagus<br>Muscularis                     | -0.17 | $1.2 \times 10^{-7}$  | 0.75 | 0.23  | 0.029  |
| 10 | <i>BMS1</i> | rs3128722 | GTEEx | <i>LINC00839</i> | Heart Atrial<br>Appendage                   | 0.41  | $6.1 \times 10^{-8}$  | 0.54 | 0.11  | 0.012  |
| 10 | <i>BMS1</i> | rs3128722 | GTEEx | <i>ZNF33B</i>    | Heart Left Ventricle                        | -0.15 | $4.1 \times 10^{-6}$  | 0.77 | 0.25  | 0.033  |
| 10 | <i>BMS1</i> | rs3128722 | GTEEx | <i>LINC00839</i> | Lung                                        | 0.36  | $1.3 \times 10^{-12}$ | 0.18 | 0.022 | 0.0022 |
| 10 | <i>BMS1</i> | rs3128722 | GTEEx | <i>LOC441666</i> | Lung                                        | 0.28  | $8.5 \times 10^{-7}$  | 0.26 | 0.034 | 0.0036 |
| 10 | <i>BMS1</i> | rs3128722 | GTEEx | <i>LINC00839</i> | Muscle Skeletal                             | 0.35  | $1.5 \times 10^{-11}$ | 0.56 | 0.11  | 0.013  |
| 10 | <i>BMS1</i> | rs3128722 | GTEEx | <i>ZNF33B</i>    | Muscle Skeletal                             | -0.29 | $2.2 \times 10^{-16}$ | 0.77 | 0.25  | 0.033  |
| 10 | <i>BMS1</i> | rs3128722 | GTEEx | <i>LINC00839</i> | Nerve Tibial                                | 0.29  | $1.7 \times 10^{-7}$  | 0.61 | 0.14  | 0.016  |
| 10 | <i>BMS1</i> | rs3128722 | GTEEx | <i>ZNF33B</i>    | Nerve Tibial                                | -0.19 | $3.3 \times 10^{-8}$  | 0.77 | 0.25  | 0.032  |
| 10 | <i>BMS1</i> | rs3128722 | GTEEx | <i>LOC441666</i> | Nerve Tibial                                | 0.32  | $2.9 \times 10^{-7}$  | 0.22 | 0.028 | 0.0029 |



|    |             |            |        |                        |                                 |       |                       |                       |                       |                       |
|----|-------------|------------|--------|------------------------|---------------------------------|-------|-----------------------|-----------------------|-----------------------|-----------------------|
| 10 | <i>BMS1</i> | rs3128722  | GTEEx  | <i>LOC441666</i>       | Pituitary                       | 0.41  | $6.7 \times 10^{-7}$  | 0.26                  | 0.035                 | 0.0036                |
| 10 | <i>BMS1</i> | rs3128722  | GTEEx  | <i>LINC00839</i>       | Prostate                        | 0.52  | $5.0 \times 10^{-9}$  | 0.19                  | 0.023                 | 0.0023                |
| 10 | <i>BMS1</i> | rs3128722  | GTEEx  | <i>LINC00839</i>       | Skin Not Sun Exposed Suprapubic | 0.39  | $5.3 \times 10^{-11}$ | 0.30                  | 0.041                 | 0.0043                |
| 10 | <i>BMS1</i> | rs3128722  | GTEEx  | <i>LINC00839</i>       | Skin Sun Exposed Lower leg      | 0.43  | $3.8 \times 10^{-13}$ | 0.18                  | 0.021                 | 0.0021                |
| 10 | <i>BMS1</i> | rs3128722  | GTEEx  | <i>LOC441666</i>       | Skin Sun Exposed Lower leg      | 0.28  | $4.8 \times 10^{-7}$  | 0.25                  | 0.033                 | 0.0034                |
| 10 | <i>BMS1</i> | rs3128722  | GTEEx  | <i>LINC00839</i>       | Testis                          | 0.35  | $5.9 \times 10^{-7}$  | 0.67                  | 0.17                  | 0.020                 |
| 10 | <i>BMS1</i> | rs3128722  | GTEEx  | <i>LINC00839</i>       | Thyroid                         | 0.22  | $6.9 \times 10^{-6}$  | 0.50                  | 0.092                 | 0.010                 |
| 10 | <i>BMS1</i> | rs3128722  | ROSMAP | <i>BMS1</i>            | Brain Prefrontal Cortex         | -0.07 | $3.7 \times 10^{-15}$ | 0.85                  | 0.37                  | 0.055                 |
| 10 | <i>BMS1</i> | rs3128722  | ROSMAP | <i>LINC00839</i>       | Brain Prefrontal Cortex         | 0.19  | $3.2 \times 10^{-12}$ | 0.54                  | 0.11                  | 0.012                 |
| 10 | <i>BMS1</i> | rs3128722  | TOPMed | <i>CCNYL2</i>          | Lung                            | 0.21  | $1.5 \times 10^{-9}$  | 0.21                  | 0.026                 | 0.0026                |
| 10 | <i>BMS1</i> | rs3128722  | TOPMed | <i>LINC00839</i>       | Lung                            | 0.32  | $7.5 \times 10^{-27}$ | 0.17                  | 0.020                 | 0.0021                |
| 10 | <i>BMS1</i> | rs3128722  | TOPMed | <i>ZNF33B</i>          | Lung                            | -0.10 | $1.4 \times 10^{-14}$ | 0.76                  | 0.24                  | 0.030                 |
| 10 | <i>BMS1</i> | rs3128722  | TOPMed | <i>LOC441666</i>       | Lung                            | 0.17  | $4.7 \times 10^{-9}$  | 0.27                  | 0.036                 | 0.0037                |
| 10 | <i>BMS1</i> | rs3128722  | TOPMed | <i>LINC02623</i>       | Lung                            | 0.14  | $2.6 \times 10^{-7}$  | 0.38                  | 0.059                 | 0.0062                |
| 10 | <i>BMS1</i> | rs3128722  | TOPMed | <i>ENSG00000259869</i> | Lung                            | -0.14 | $2.6 \times 10^{-7}$  | 0.43                  | 0.071                 | 0.0076                |
| 10 | <i>BMS1</i> | rs3128722  | TOPMed | <i>ZNF33B</i>          | PBMC                            | -0.08 | $8.2 \times 10^{-6}$  | 0.66                  | 0.16                  | 0.019                 |
| 10 | <i>BMS1</i> | rs3128722  | TOPMed | <i>RET</i>             | Whole blood                     | 0.06  | $5.2 \times 10^{-6}$  | 0.21                  | 0.026                 | 0.0027                |
| 10 | <i>BMS1</i> | rs3128722  | TOPMed | <i>BMS1</i>            | Whole blood                     | -0.03 | $4.5 \times 10^{-9}$  | 0.57                  | 0.12                  | 0.013                 |
| 10 | <i>BMS1</i> | rs3128722  | TOPMed | <i>ZNF33B</i>          | Whole blood                     | -0.07 | $1.5 \times 10^{-36}$ | 0.77                  | 0.25                  | 0.033                 |
| 10 | <i>BMS1</i> | rs3128722  | TOPMed | <i>LOC105378268</i>    | Whole blood                     | -0.16 | $5.3 \times 10^{-35}$ | 0.17                  | 0.020                 | 0.0021                |
| 15 | <i>FBNI</i> | rs12591575 | TOPMed | <i>DUT</i>             | Whole blood                     | -0.07 | $6.9 \times 10^{-7}$  | 0.30                  | 0.041                 | 0.0042                |
| 15 | <i>FBNI</i> | rs12591575 | TOPMed | <i>FBNI</i>            | Whole blood                     | -0.23 | $7.1 \times 10^{-16}$ | 0.24                  | 0.031                 | 0.0032                |
| 19 | <i>APOE</i> | rs429358   | TOPMed | <i>APOE</i>            | Lung                            | 0.16  | $1.7 \times 10^{-12}$ | $4.5 \times 10^{-10}$ | $4.5 \times 10^{-11}$ | $4.5 \times 10^{-12}$ |

\* The effect allele is the same as that shown in Supplementary Table 7.

PPH4 = posterior probability for a hypothesis that both traits are associated and share the same single nucleotide variants

**Supplementary Table 14.** Results on colocalization analyses from multi resources for significant and suggestive significant single nucleotide variants associated with the estimated factor 3 (Lewy body pathology related) score in subjects aged 65 years or older at death

| Chr | Gene         | SNV         | Source | Gene expression   | Tissue                     | $\beta$ | P-value               | PPH4             |                  |                  |
|-----|--------------|-------------|--------|-------------------|----------------------------|---------|-----------------------|------------------|------------------|------------------|
|     |              |             |        |                   |                            |         |                       | 10 <sup>-4</sup> | 10 <sup>-5</sup> | 10 <sup>-6</sup> |
| 7   | <i>ADAP1</i> | rs112886046 | GTEEx  | <i>ADAP1</i>      | Esophagus Muscularis       | -0.32   | 5.2×10 <sup>-6</sup>  | 0.62             | 0.14             | 0.016            |
| 7   | <i>ADAP1</i> | rs112886046 | TOPMed | <i>ADAP1</i>      | Whole blood                | -0.11   | 2.6×10 <sup>-17</sup> | 0.92             | 0.55             | 0.11             |
| 7   | <i>ADAP1</i> | rs112886046 | TOPMed | <i>COX19</i>      | Whole blood                | -0.10   | 1.6×10 <sup>-9</sup>  | 0.92             | 0.55             | 0.11             |
| 7   | <i>EPHB4</i> | rs75881054  | GTEEx  | <i>GNB2</i>       | Cells Cultured fibroblasts | -0.25   | 3.5×10 <sup>-9</sup>  | 0.91             | 0.51             | 0.093            |
| 7   | <i>EPHB4</i> | rs75881054  | GTEEx  | <i>EPHB4</i>      | Whole Blood                | -0.44   | 7.1×10 <sup>-8</sup>  | 0.28             | 0.037            | 0.0038           |
| 7   | <i>EPHB4</i> | rs75881054  | TOPMed | <i>PILRB</i>      | Lung                       | 0.11    | 5.7×10 <sup>-6</sup>  | 0.41             | 0.066            | 0.0070           |
| 7   | <i>EPHB4</i> | rs75881054  | TOPMed | <i>GNB2</i>       | Lung                       | -0.13   | 5.3×10 <sup>-12</sup> | 0.88             | 0.42             | 0.068            |
| 7   | <i>EPHB4</i> | rs75881054  | TOPMed | <i>STAG3L5P</i>   | Lung                       | 0.15    | 2.2×10 <sup>-7</sup>  | 0.41             | 0.065            | 0.0069           |
| 7   | <i>EPHB4</i> | rs75881054  | TOPMed | <i>UFSP1</i>      | PBMC                       | 0.43    | 5.9×10 <sup>-7</sup>  | 0.99             | 0.91             | 0.51             |
| 7   | <i>EPHB4</i> | rs75881054  | TOPMed | <i>STAG3</i>      | Whole blood                | -0.06   | 4.4×10 <sup>-10</sup> | 0.34             | 0.049            | 0.0052           |
| 7   | <i>EPHB4</i> | rs75881054  | TOPMed | <i>TRIP6</i>      | Whole blood                | -0.12   | 1.3×10 <sup>-7</sup>  | 0.20             | 0.024            | 0.0025           |
| 7   | <i>EPHB4</i> | rs75881054  | TOPMed | <i>TFR2</i>       | Whole blood                | 0.12    | 3.6×10 <sup>-7</sup>  | 0.18             | 0.022            | 0.0022           |
| 7   | <i>EPHB4</i> | rs75881054  | TOPMed | <i>PILRB</i>      | Whole blood                | 0.12    | 5.6×10 <sup>-9</sup>  | 0.40             | 0.063            | 0.0067           |
| 7   | <i>EPHB4</i> | rs75881054  | TOPMed | <i>EPO</i>        | Whole blood                | 0.23    | 6.3×10 <sup>-9</sup>  | 0.97             | 0.79             | 0.27             |
| 7   | <i>EPHB4</i> | rs75881054  | TOPMed | <i>MEPCE</i>      | Whole blood                | -0.06   | 6.4×10 <sup>-8</sup>  | 0.32             | 0.045            | 0.0047           |
| 7   | <i>EPHB4</i> | rs75881054  | TOPMed | <i>UFSP1</i>      | Whole blood                | 0.17    | 4.1×10 <sup>-9</sup>  | 0.18             | 0.021            | 0.0022           |
| 7   | <i>EPHB4</i> | rs75881054  | TOPMed | <i>EPHB4</i>      | Whole blood                | -0.15   | 1.1×10 <sup>-7</sup>  | 0.25             | 0.031            | 0.0032           |
| 7   | <i>EPHB4</i> | rs75881054  | TOPMed | <i>PVRIG</i>      | Whole blood                | -0.05   | 5.7×10 <sup>-9</sup>  | 0.34             | 0.049            | 0.0051           |
| 7   | <i>EPHB4</i> | rs75881054  | TOPMed | <i>PCOLCE-ASI</i> | Whole blood                | 0.18    | 9.9×10 <sup>-6</sup>  | 0.23             | 0.028            | 0.0029           |
| 7   | <i>EPHB4</i> | rs75881054  | TOPMed | ENSG00000235333   | Whole blood                | 0.07    | 2.8×10 <sup>-6</sup>  | 0.43             | 0.069            | 0.0074           |
| 16  | <i>PLCG2</i> | rs146614066 | TOPMed | <i>SDR42E1</i>    | Whole blood                | -0.17   | 1.3×10 <sup>-8</sup>  | 0.66             | 0.16             | 0.019            |

\* The effect allele is the same as that shown in Supplementary Table 9.

PPH4 = posterior probability for a hypothesis that both traits are associated and share the same single nucleotide variants

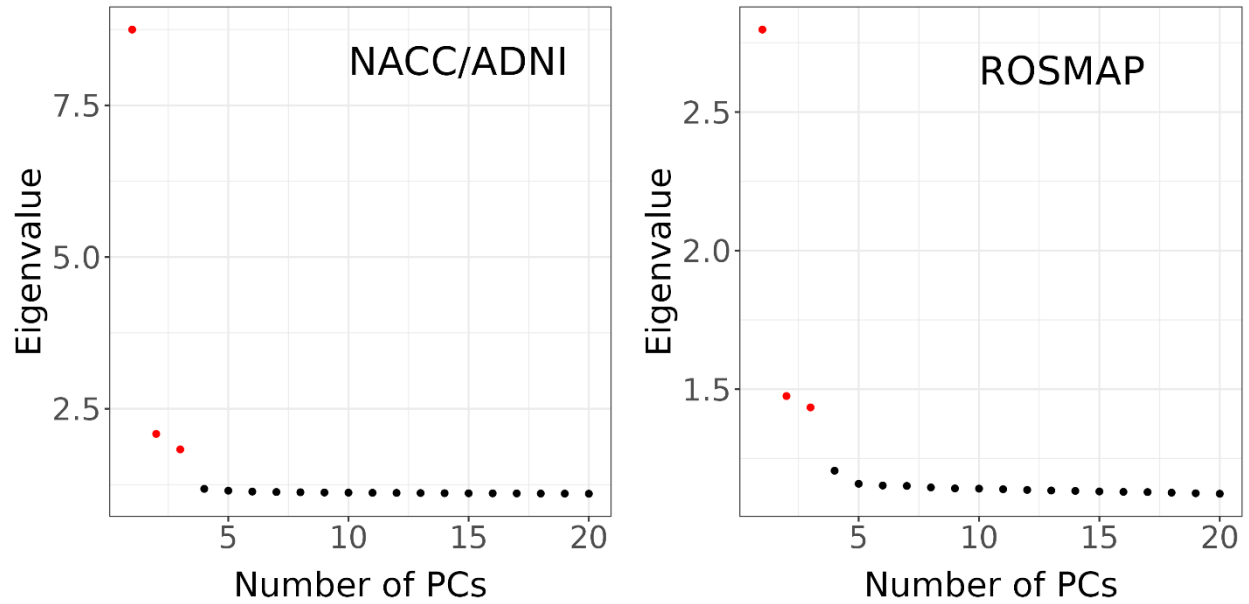

**Supplementary Figure 1.** Principal component analysis scree plots in NACC/ADNI and ROSMAP

PC = principal component; NACC = National Alzheimer's Coordinating Center; ADNI = Alzheimer's Disease Neuroimaging Initiative; ROSMAP = Religious Orders Study and Rush Memory and Aging Project

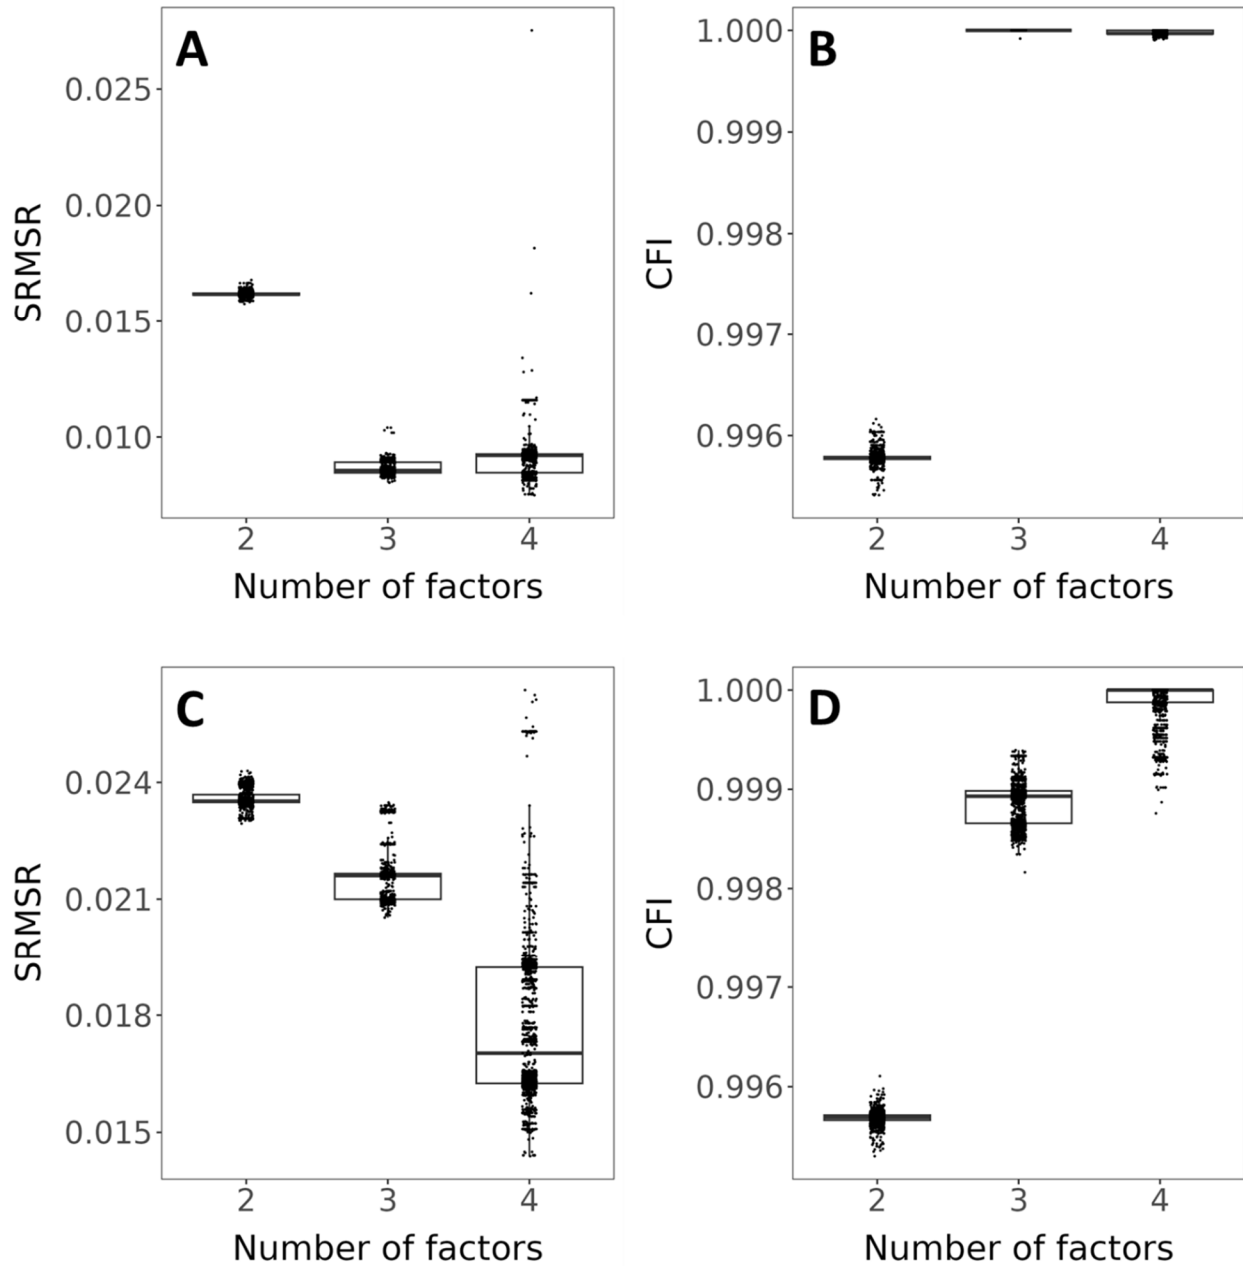

**Supplementary Figure 2.** Comparisons in model fit indices among two-, three-, and four-dimensional generalized partial credit models using leave-one-out cross-validation in NACC/ADNI (A and B) and ROSMAP (C and D)

SRMSR = standardized root mean square residual; CFI = comparative fit index

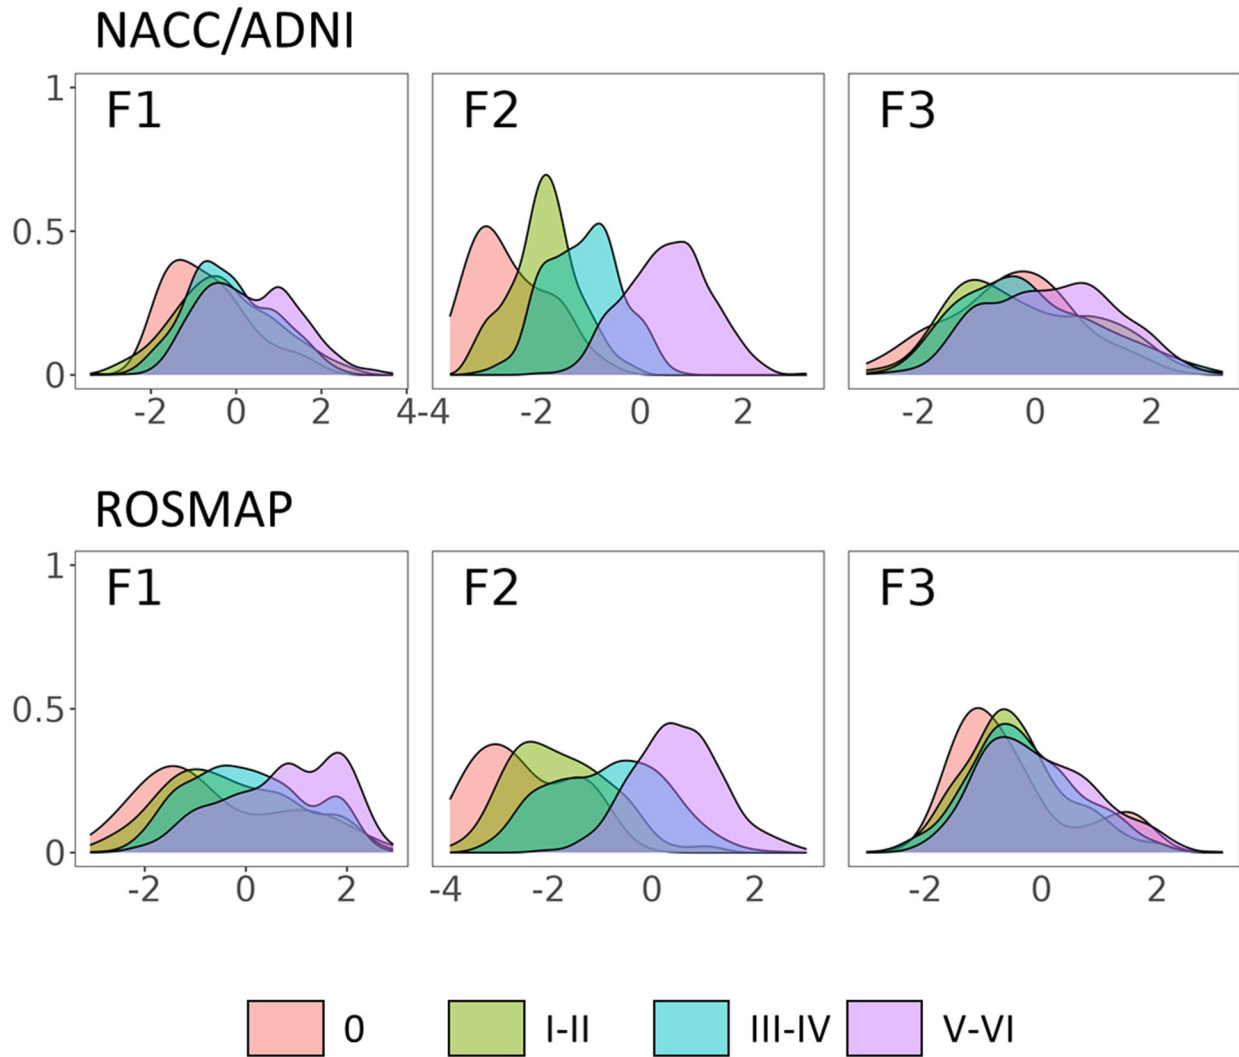

**Supplementary Figure 3.** Density plots in each estimated factor score by Braak neurofibrillary tangle Stage

NACC = National Alzheimer's Coordinating Center; ADNI = Alzheimer's Disease Neuroimaging Initiative; ROSMAP = Religious Orders Study and Rush Memory and Aging Project

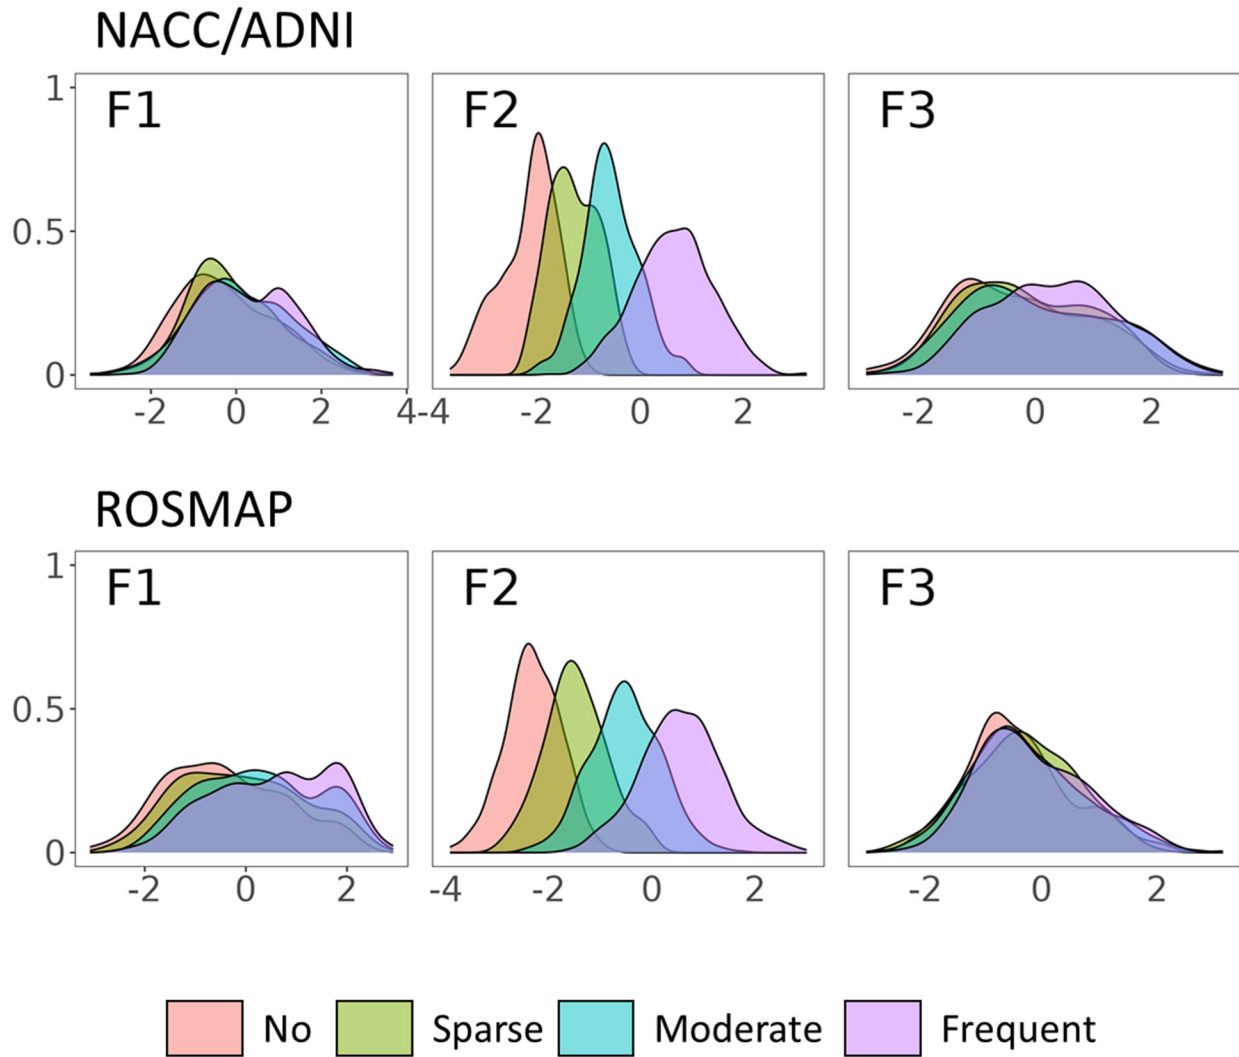

**Supplementary Figure 4.** Density plots in each estimated factor score by neuritic plaques

NACC = National Alzheimer's Coordinating Center; ADNI = Alzheimer's Disease Neuroimaging Initiative; ROSMAP = Religious Orders Study and Rush Memory and Aging Project

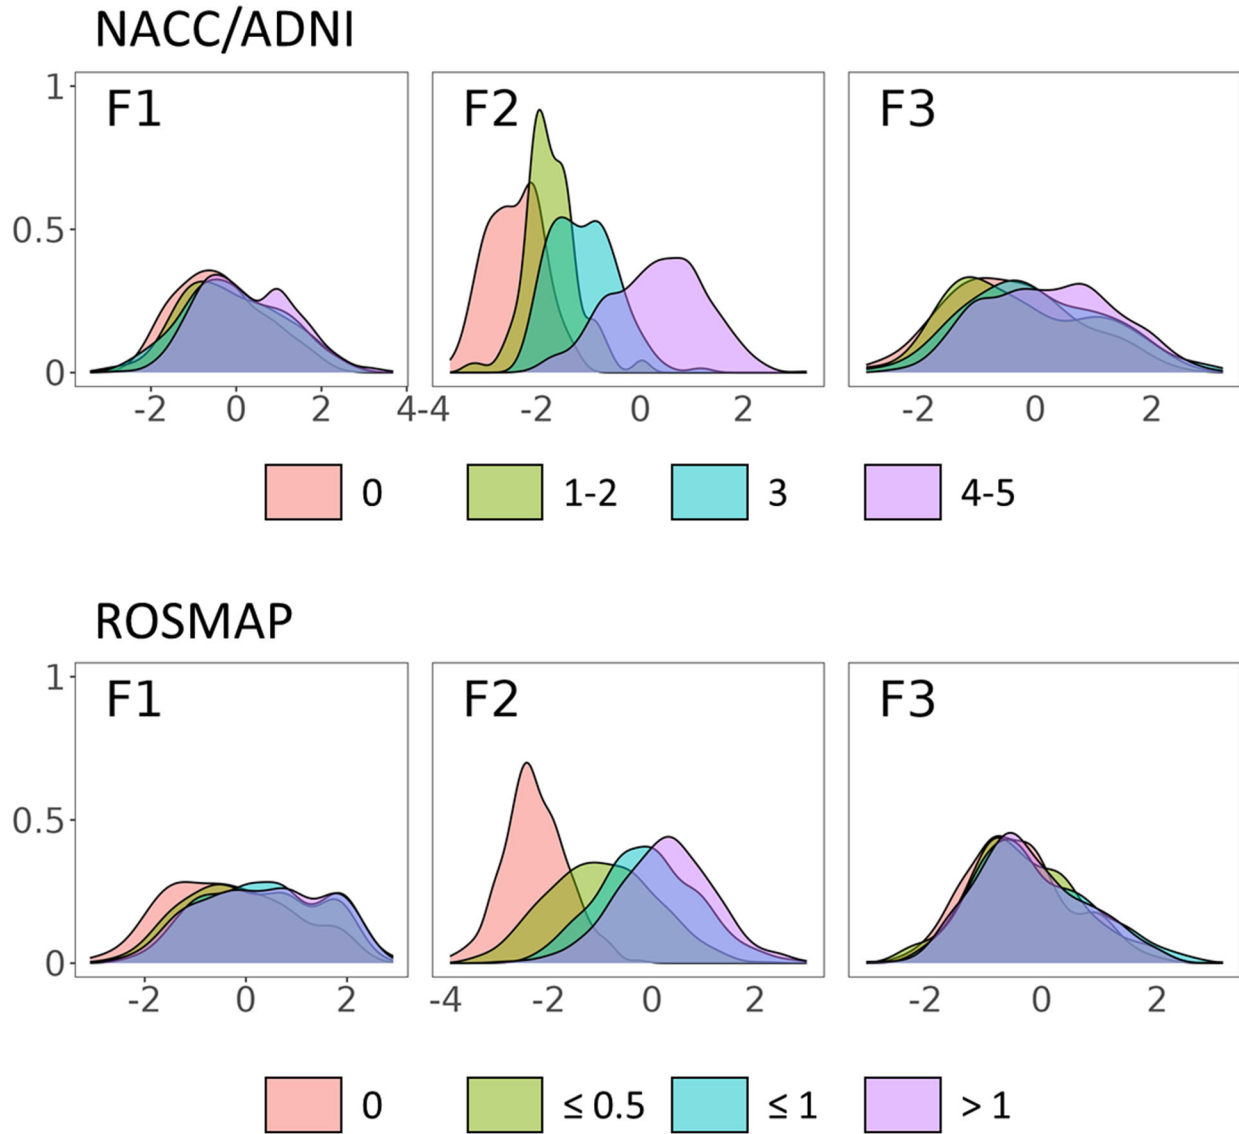

**Supplementary Figure 5.** Density plots in each estimated factor score colored by Thal phase in NACC and diffuse plaque across regions in ROSMAP

NACC = National Alzheimer's Coordinating Center; ADNI = Alzheimer's Disease Neuroimaging Initiative; ROSMAP = Religious Orders Study and Rush Memory and Aging Project

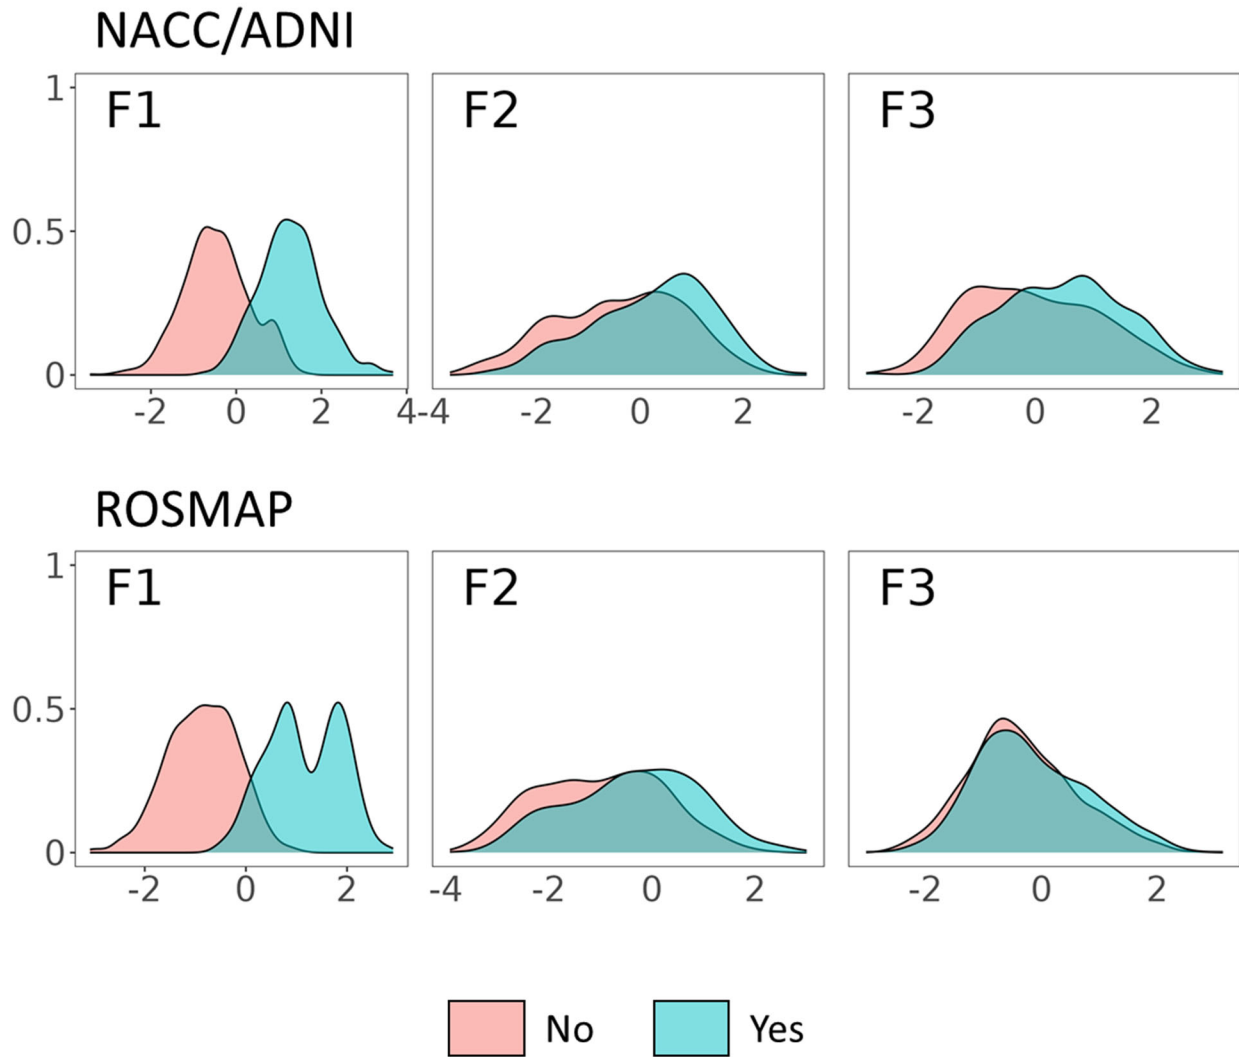

**Supplementary Figure 6.** Density plots in each estimated factor score colored by TDP-43 in amygdala

NACC = National Alzheimer's Coordinating Center; ADNI = Alzheimer's Disease Neuroimaging Initiative; ROSMAP = Religious Orders Study and Rush Memory and Aging Project



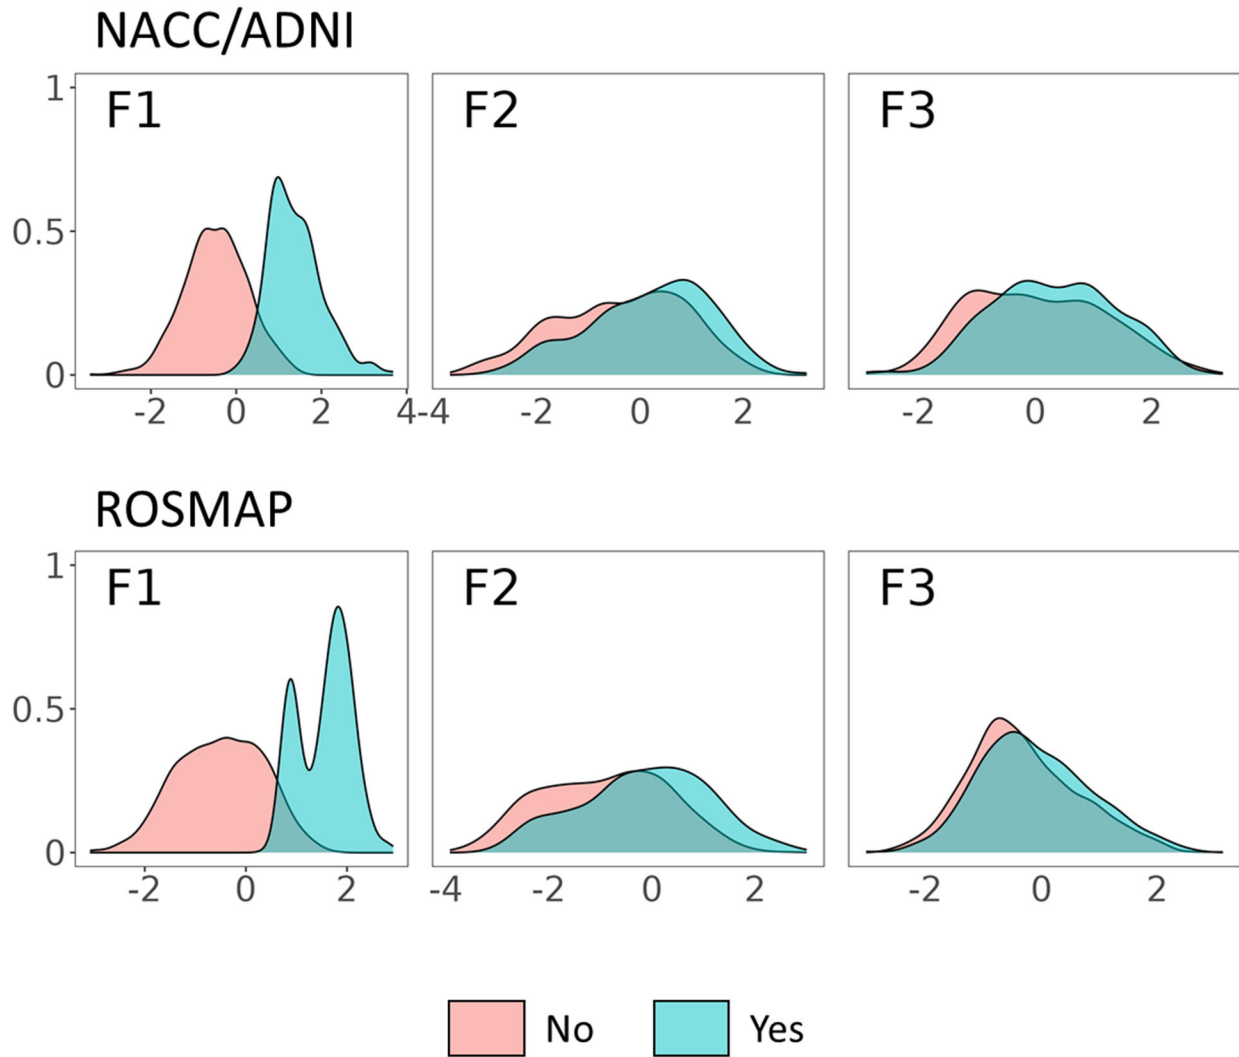

**Supplementary Figure 7.** Density plots in each estimated factor score colored by TDP-43 in limbic

NACC = National Alzheimer's Coordinating Center; ADNI = Alzheimer's Disease Neuroimaging Initiative; ROSMAP = Religious Orders Study and Rush Memory and Aging Project

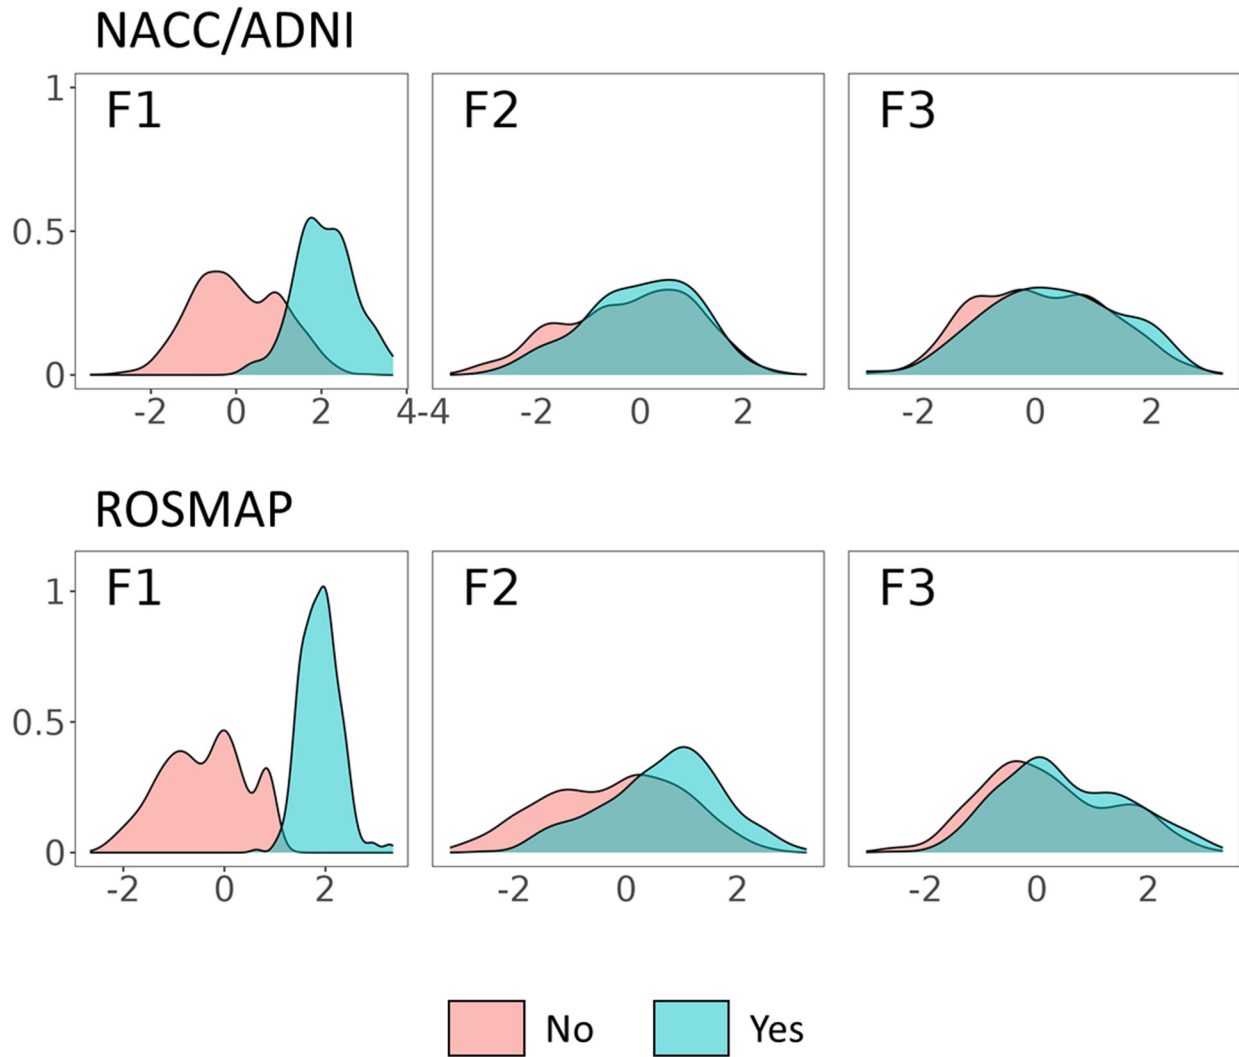

**Supplementary Figure 8.** Density plots in each estimated factor score colored by TDP-43 in neocortex

NACC = National Alzheimer's Coordinating Center; ADNI = Alzheimer's Disease Neuroimaging Initiative; ROSMAP = Religious Orders Study and Rush Memory and Aging Project

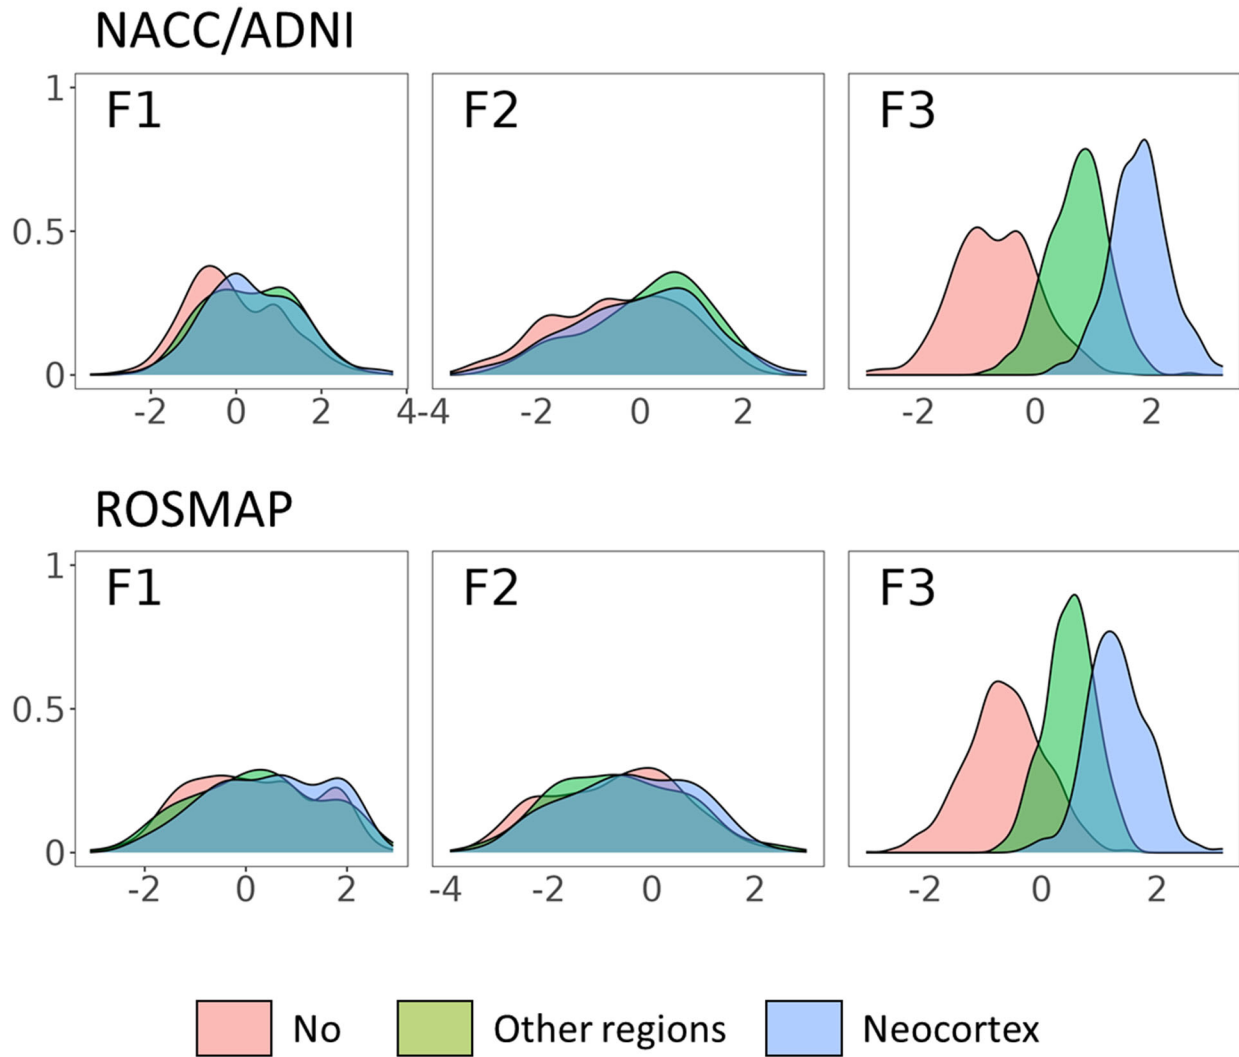

**Supplementary Figure 9.** Density plots in each estimated factor score colored by Lewy bodies

NACC = National Alzheimer's Coordinating Center; ADNI = Alzheimer's Disease Neuroimaging Initiative; ROSMAP = Religious Orders Study and Rush Memory and Aging Project

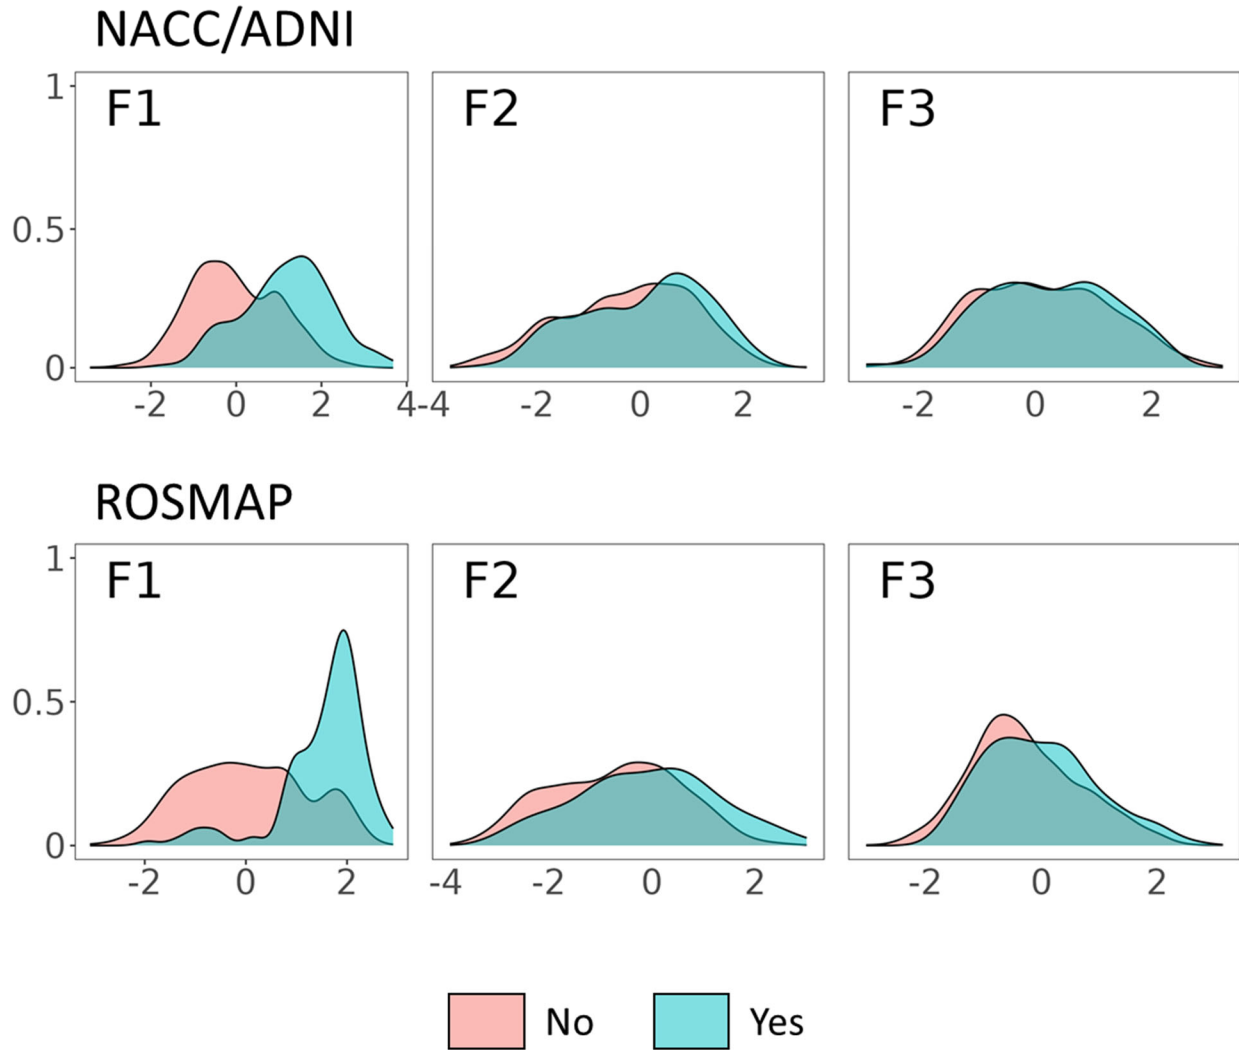

**Supplementary Figure 10.** Density plots in each estimated factor score colored by hippocampal sclerosis

NACC = National Alzheimer's Coordinating Center; ADNI = Alzheimer's Disease Neuroimaging Initiative; ROSMAP = Religious Orders Study and Rush Memory and Aging Project

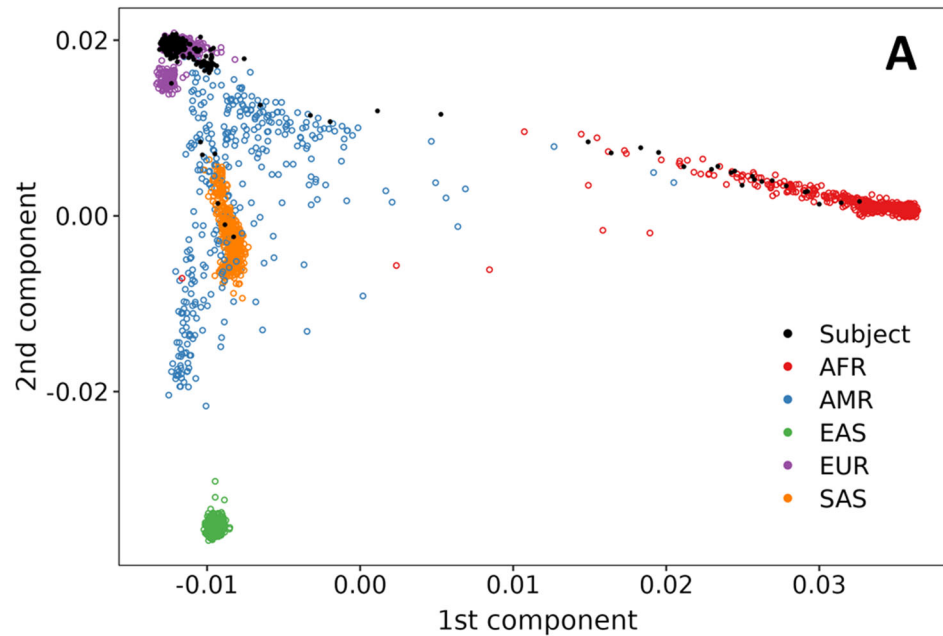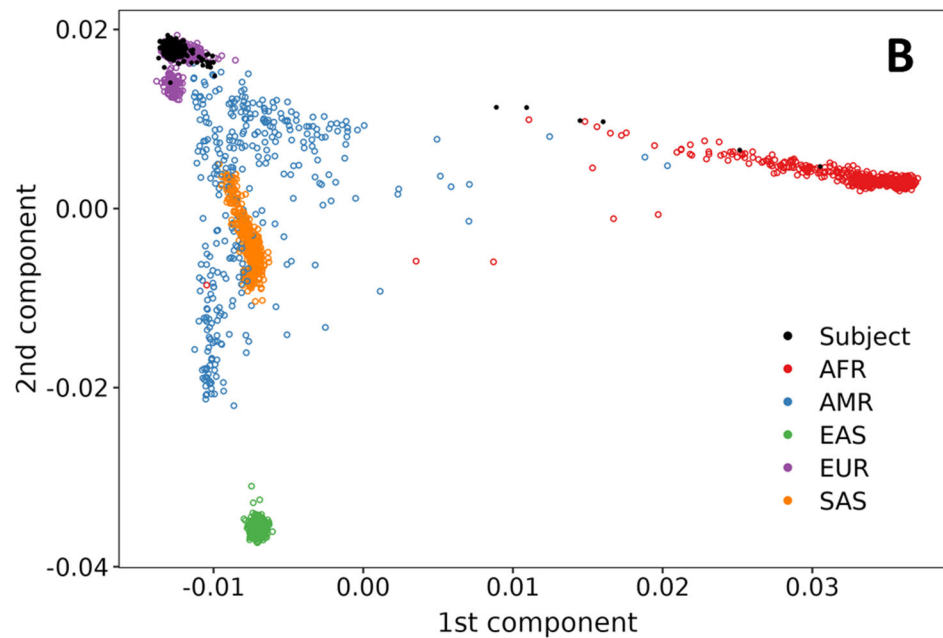

**Supplementary Figure 11.** First and second principal components plots along with 1000 genome reference samples. Block dots indicate individuals in the NACC/ADNI (A) and ROSMAP (B) dataset

NACC = National Alzheimer's Coordinating Center; ADNI = Alzheimer's Disease Neuroimaging Initiative; ROSMAP = Religious Orders Study (ROS) and Rush Memory and Aging Project (MAP); AFR = African; AMR = Admixed American; EAS = East Asian; EUR = European; SAS = South Asian

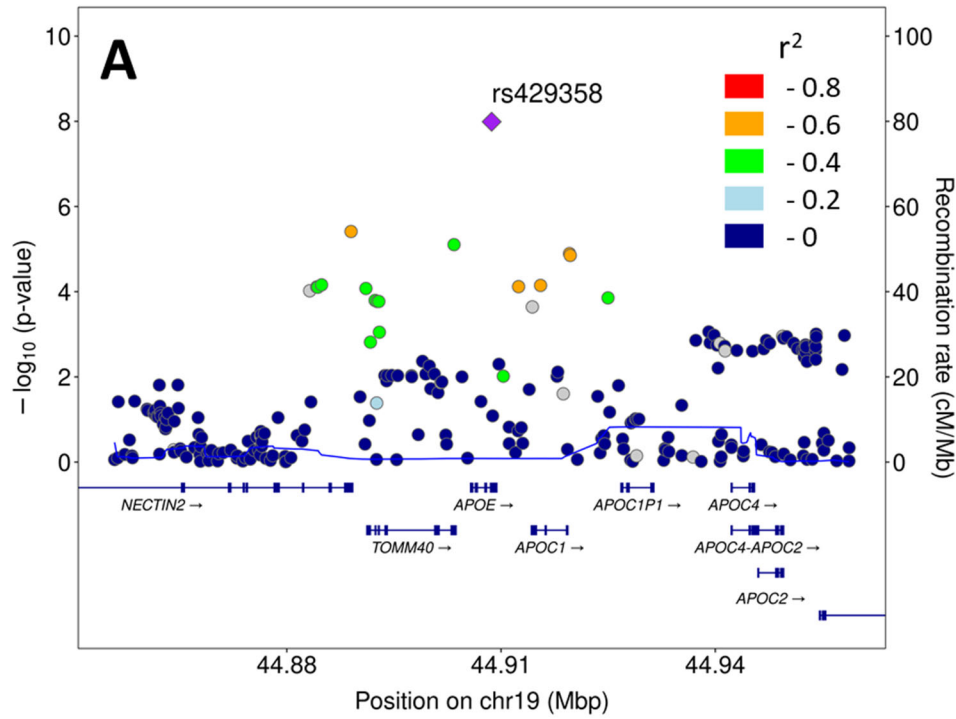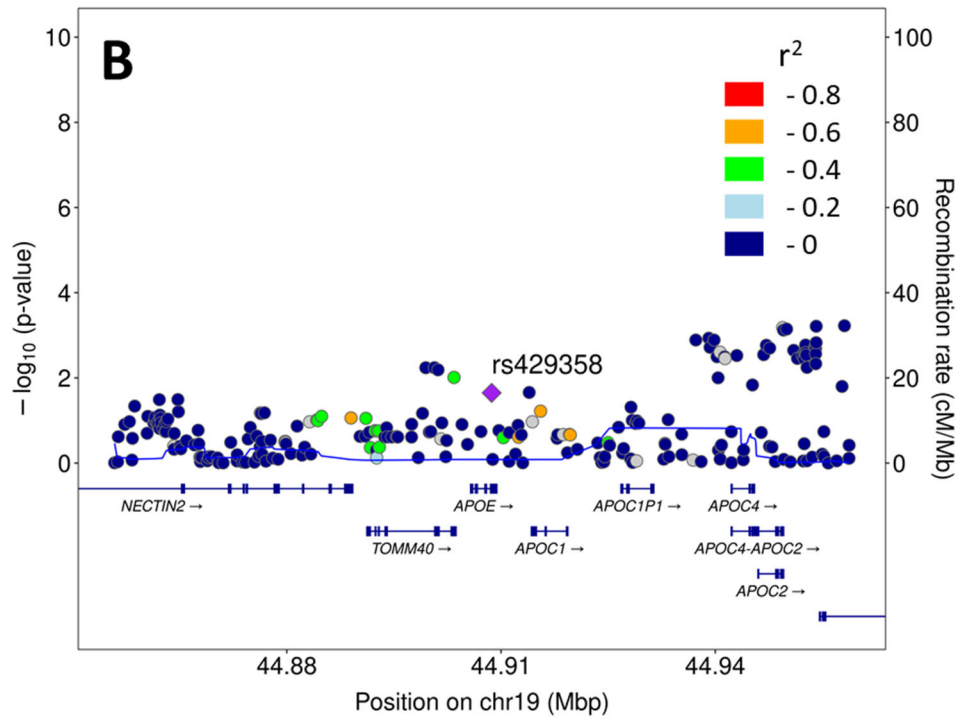

**Supplementary Figure 12.** Associations of single nucleotide variants in *APOE* with the estimated factor 1 (TDP-43 and hippocampal sclerosis) score adjusted for age, sex, and the top three principal components (A), and additionally adjusted for the other factor scores (B) in subjects aged 65 years or older at death

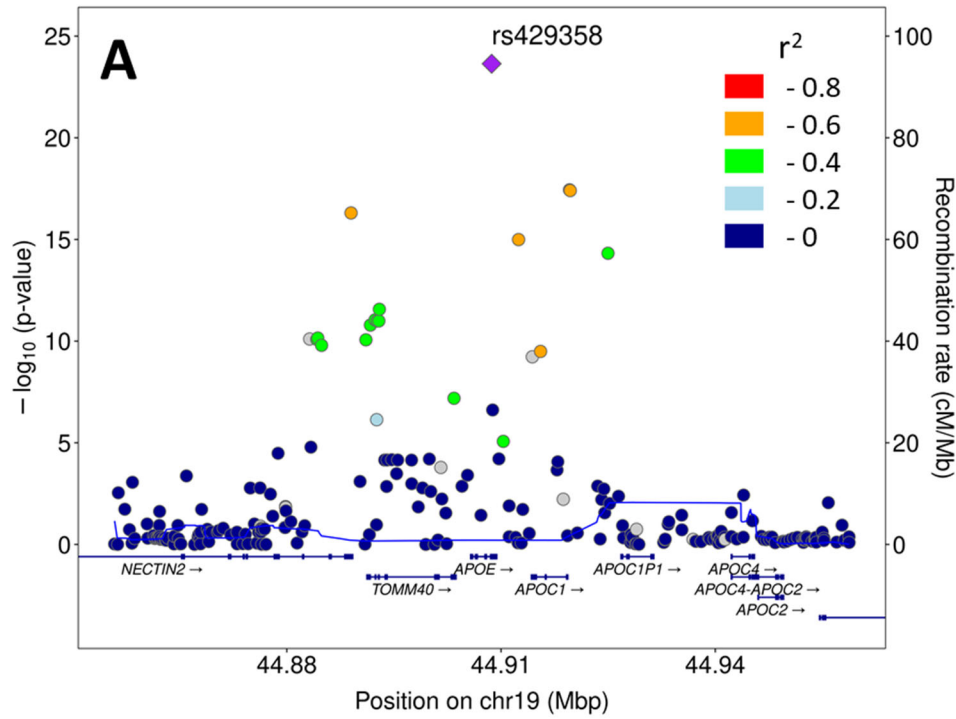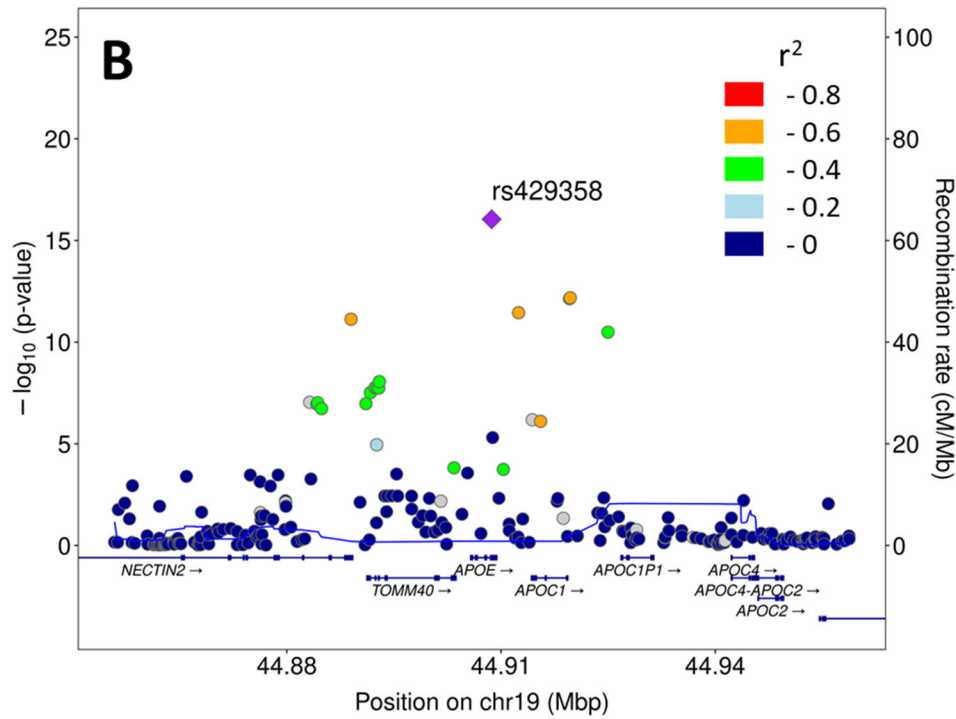

**Supplementary Figure 13.** Associations of single nucleotide variants in *APOE* with the estimated factor 2 (Alzheimer’s disease neuropathologic changes related) score adjusted for age, sex, and the top three principal components (A), and additionally adjusted for the other factor scores (B) in subjects aged 65 years or older at death

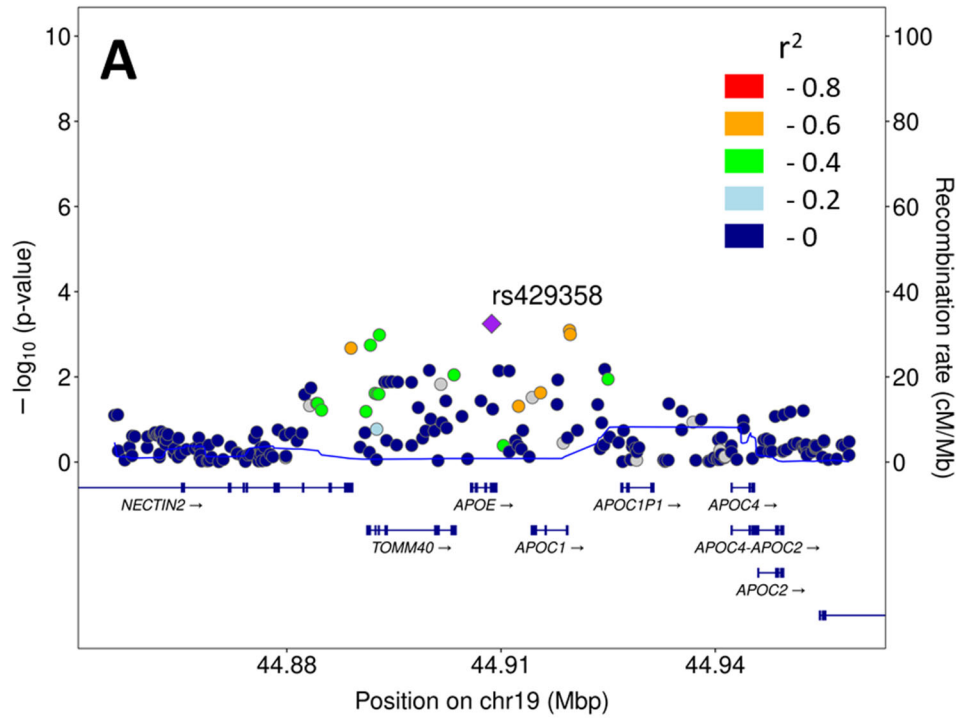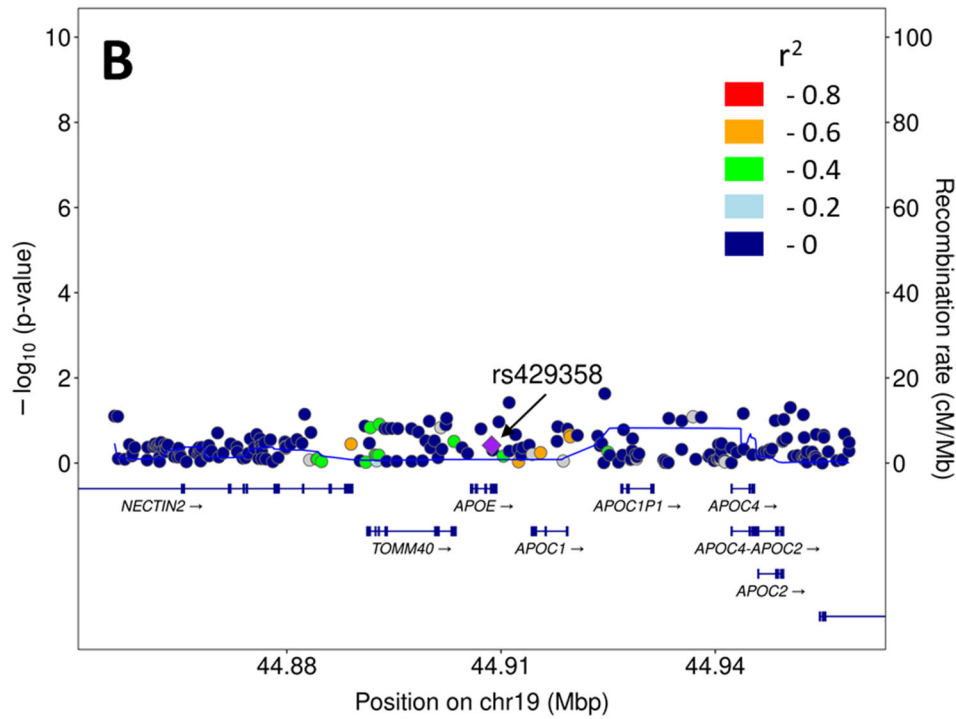

**Supplementary Figure 14.** Associations of single nucleotide variants in *APOE* with the estimated factor 3 (Lewy body pathology related) score adjusted for age, sex, and the top three principal components (A), and additionally adjusted for the other factor scores (B) in subjects aged 65 years or older at death



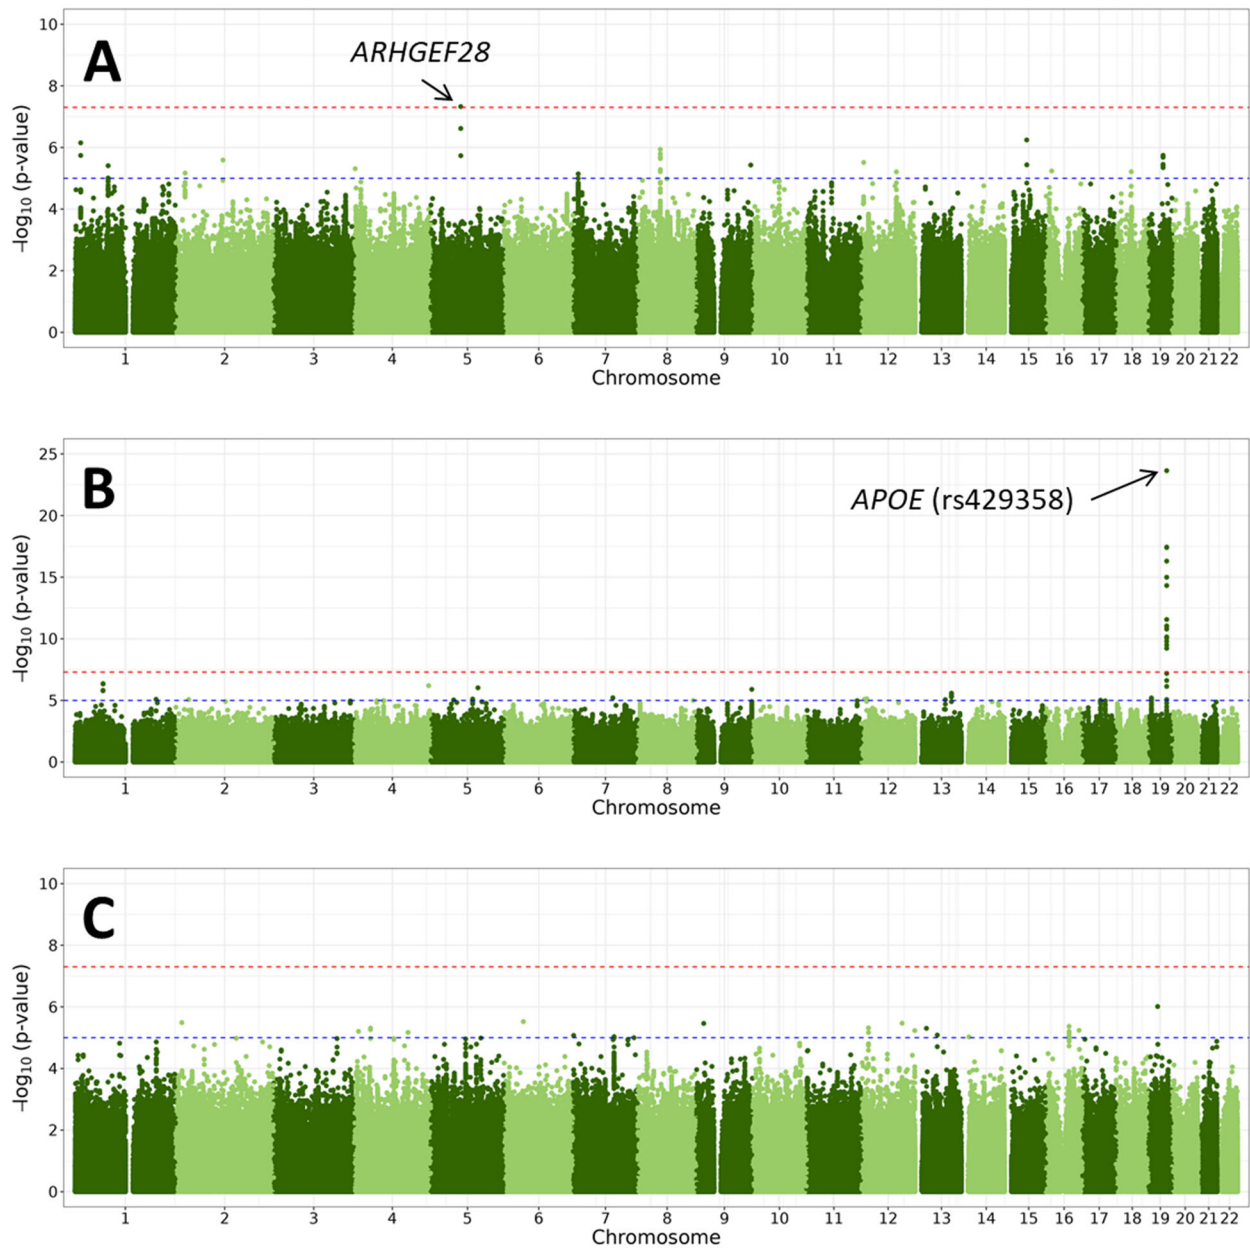

**Supplementary Figure 15.** Manhattan plot for associations with the estimated factor 1 (TDP-43 and hippocampal sclerosis) score (A), the estimated factor 2 (Alzheimer's disease related) score (B), and the estimated factor 3 (Lewy body pathology related) score (C) adjusted for age, sex, and the top three principal components in subjects aged 65 years or older at death

The red dotted line indicates the significance level and the blue dotted line indicates the suggestively significance level.

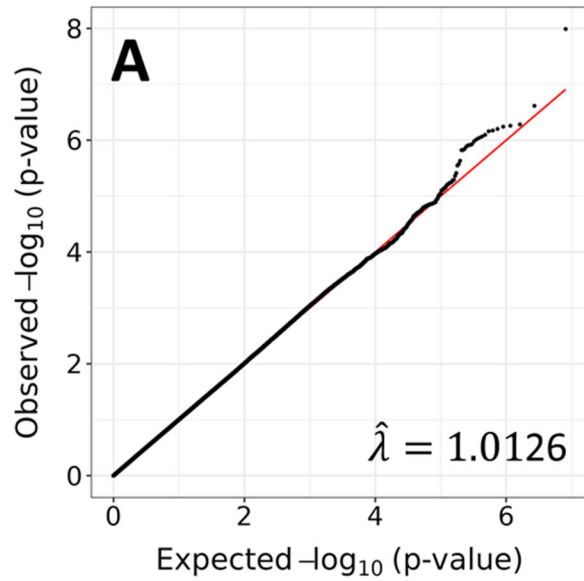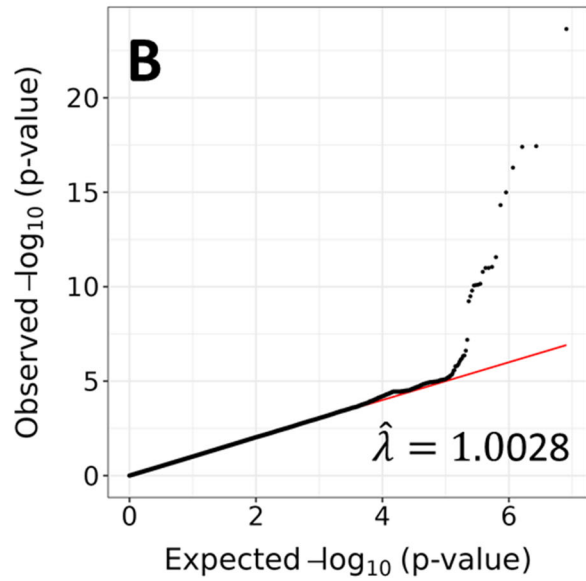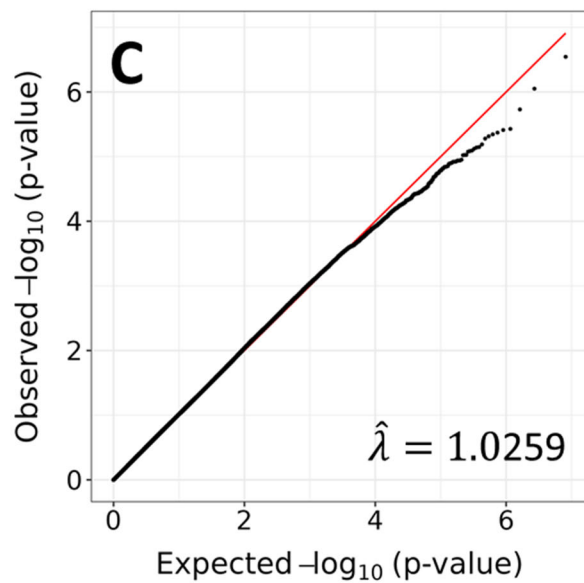

**Supplementary Figure 16.** QQ plot for associations with the estimated factor 1 (TDP-43 and hippocampal sclerosis) score (A), the estimated factor 2 (Alzheimer's disease related) score (B), and the estimated factor 3 (Lewy body pathology related) score (C) adjusted for age, sex, and the top three principal components in subjects aged 65 years or older at death

Genomic inflation factor ( $\lambda$ ) was estimated from the median of the chi-square statistic divided by 0.456.

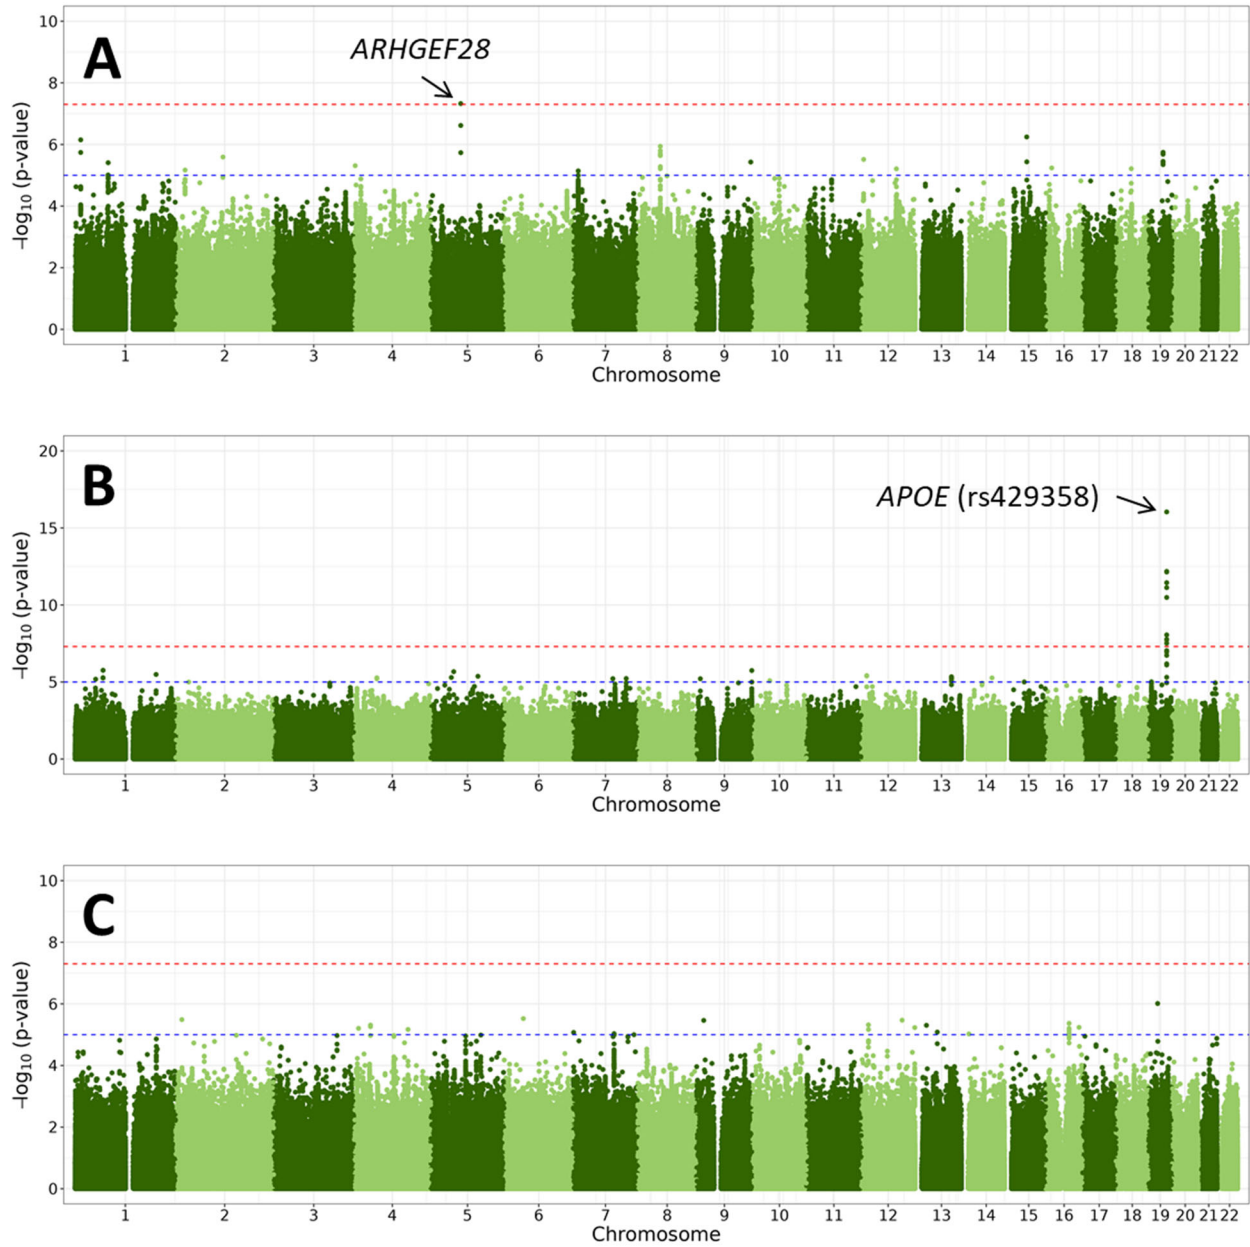

**Supplementary Figure 17.** Manhattan plot for associations with the estimated factor 1 (TDP-43 and hippocampal sclerosis) score (A), the estimated factor 2 (Alzheimer’s disease related) score (B), and the estimated factor 3 (Lewy body pathology related) score (C) adjusted for age, sex, the top three principal components, and the other factor scores in subjects aged 65 years or older at death

The red dotted line indicates the significance level and the blue dotted line indicates the suggestively significance level.

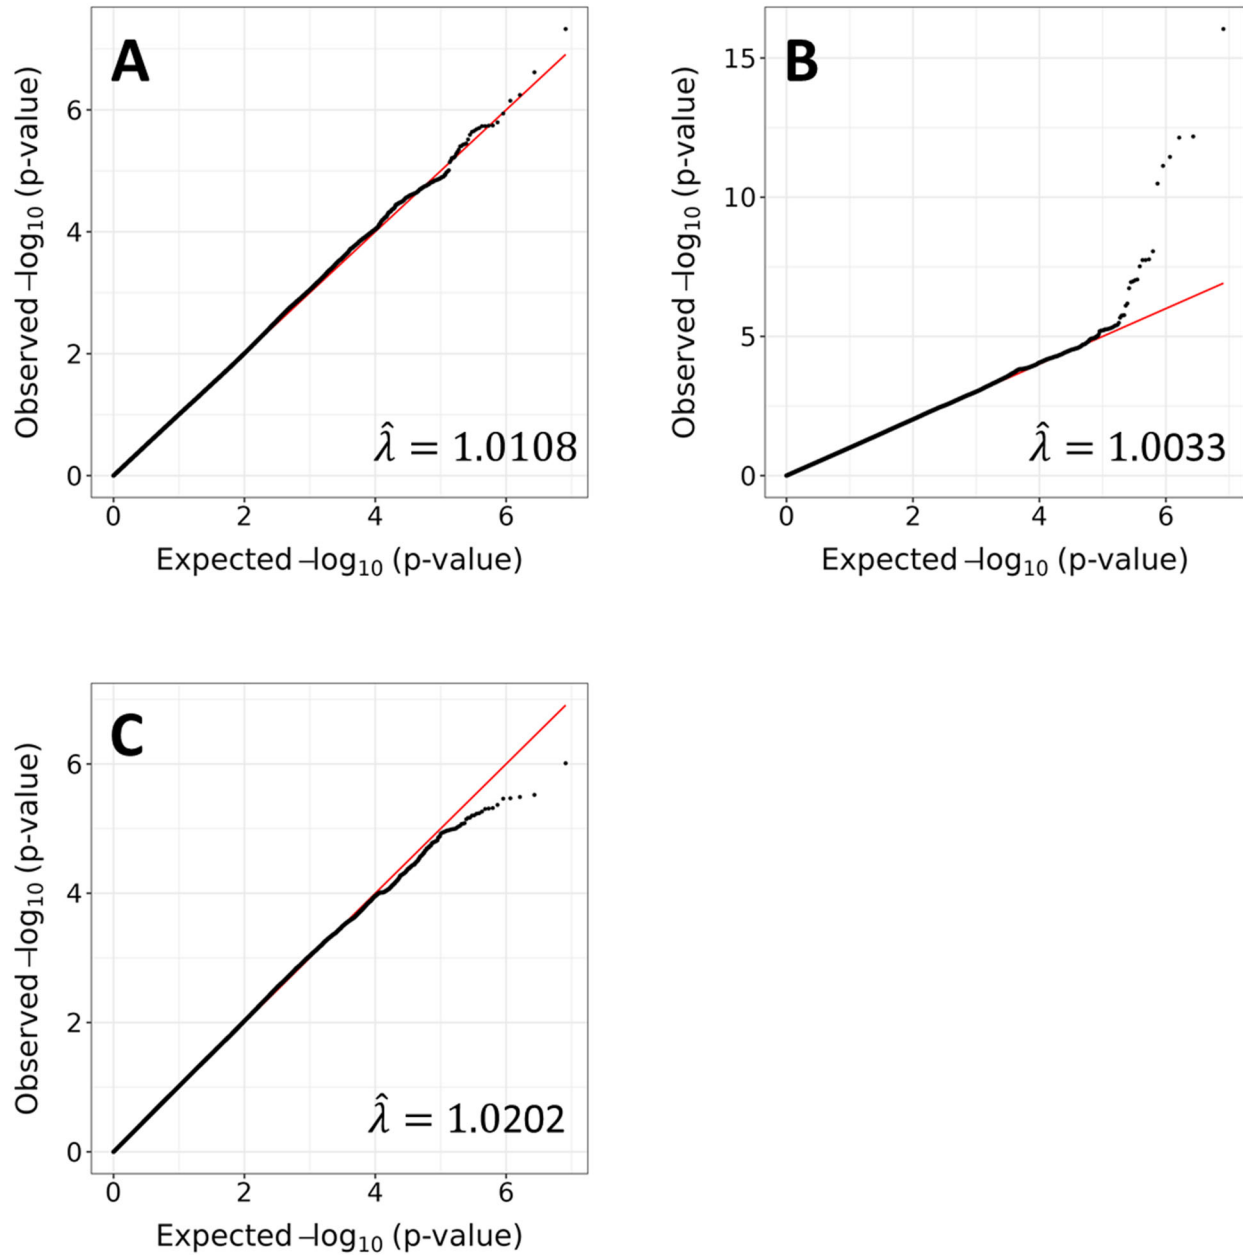

**Supplementary Figure 18.** QQ plot for associations with the estimated factor 1 (TDP-43 and hippocampal sclerosis) score (A), the estimated factor 2 (Alzheimer’s disease related) score (B), and the estimated factor 3 (Lewy body pathology related) score (C) adjusted for age, sex, the top three principal components, and the other factor scores in subjects aged 65 years or older at death

Genomic inflation factor ( $\lambda$ ) was estimated from the median of the chi-square statistic divided by 0.456.

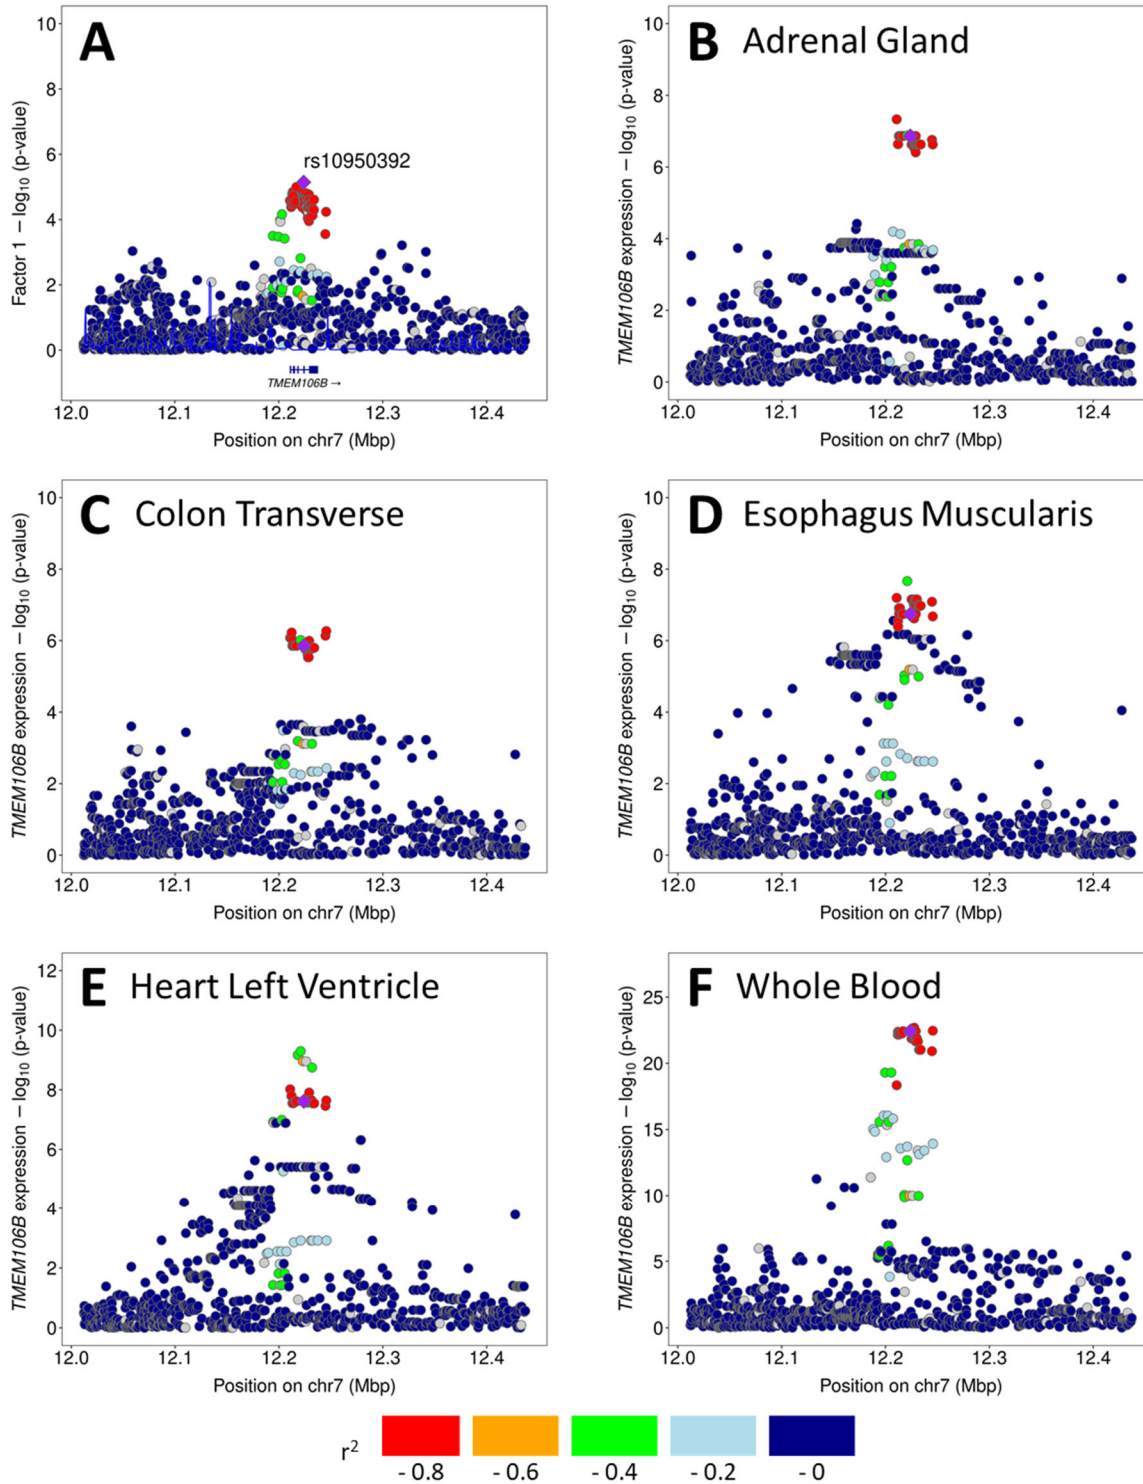

**Supplementary Figure 19.** LocusZoom plots for the association of single nucleotide variants with the estimated factor 1 (TDP-43 and hippocampal sclerosis) score in *TMEM106B* (A) and with the *TMEM106B* expressions in Adrenal Gland (B), Colon Transverse (C), Esophagus Muscularis (D), Heart Left Ventricle (E), and Whole Blood (F) from GTEx

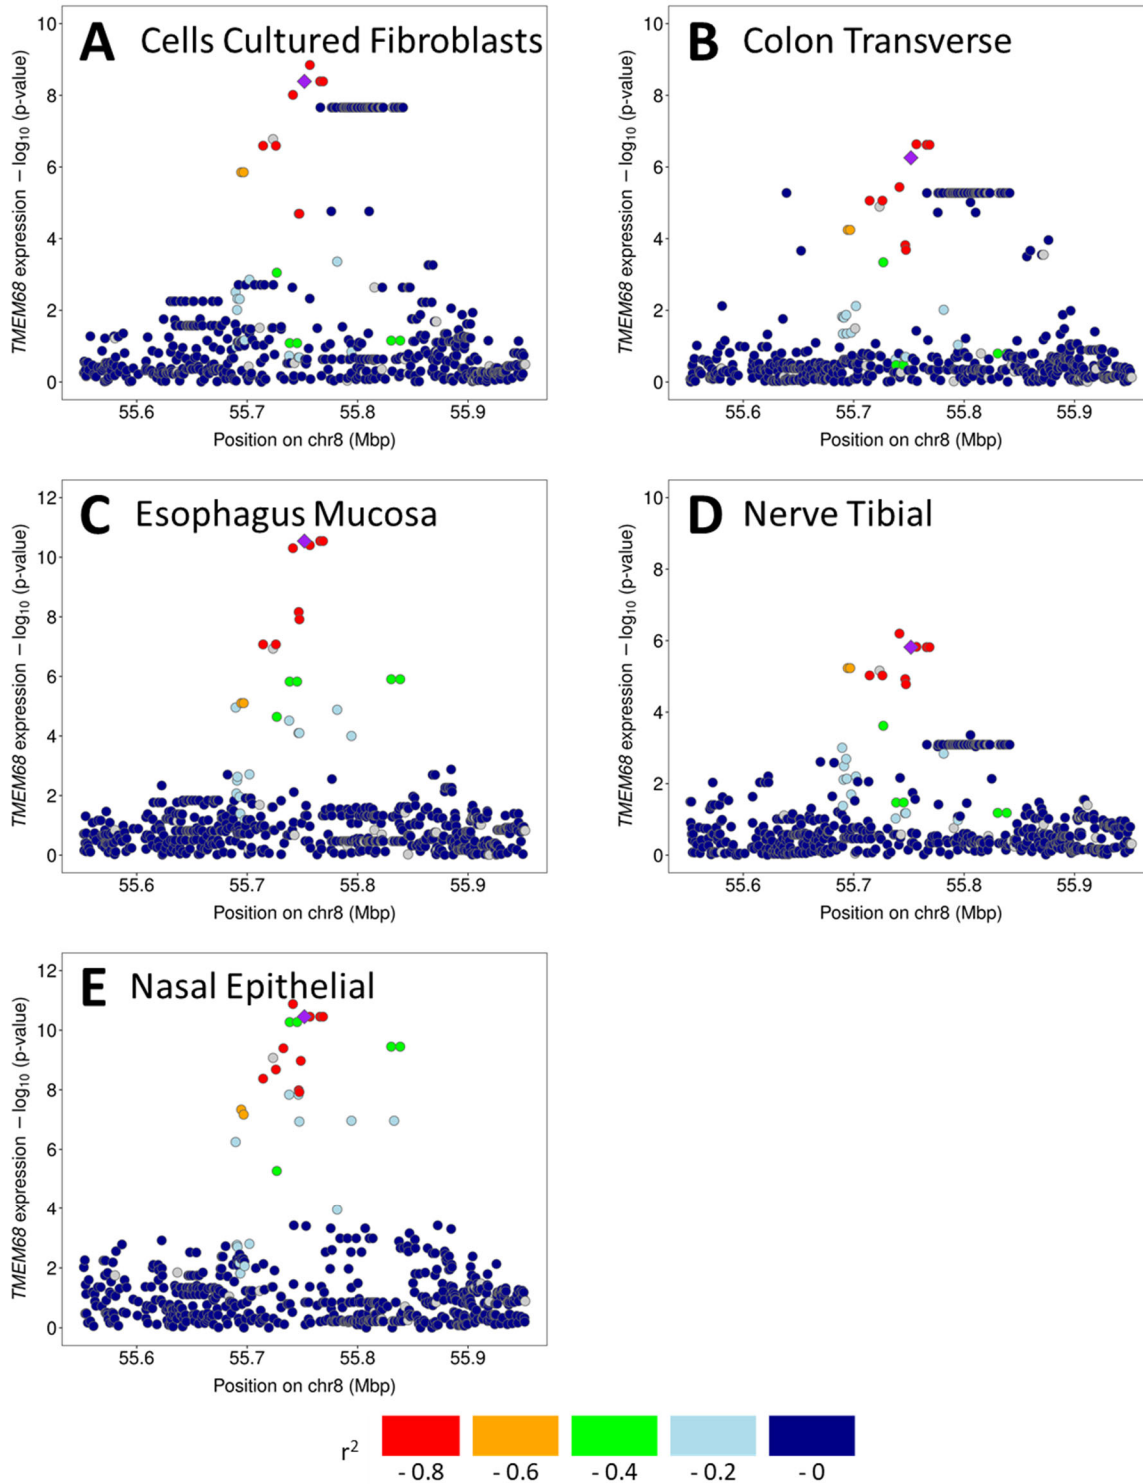

**Supplementary Figure 20.** LocusZoom plots for the association of single nucleotide variants with the *TMEM68* expressions in Cells Cultured Fibroblasts (A), Colon Transverse (B), Esophagus Mucosa (C), and Nerve Tibial (D) from GTEx, and Nasal Epithelial (F) from TOPMed



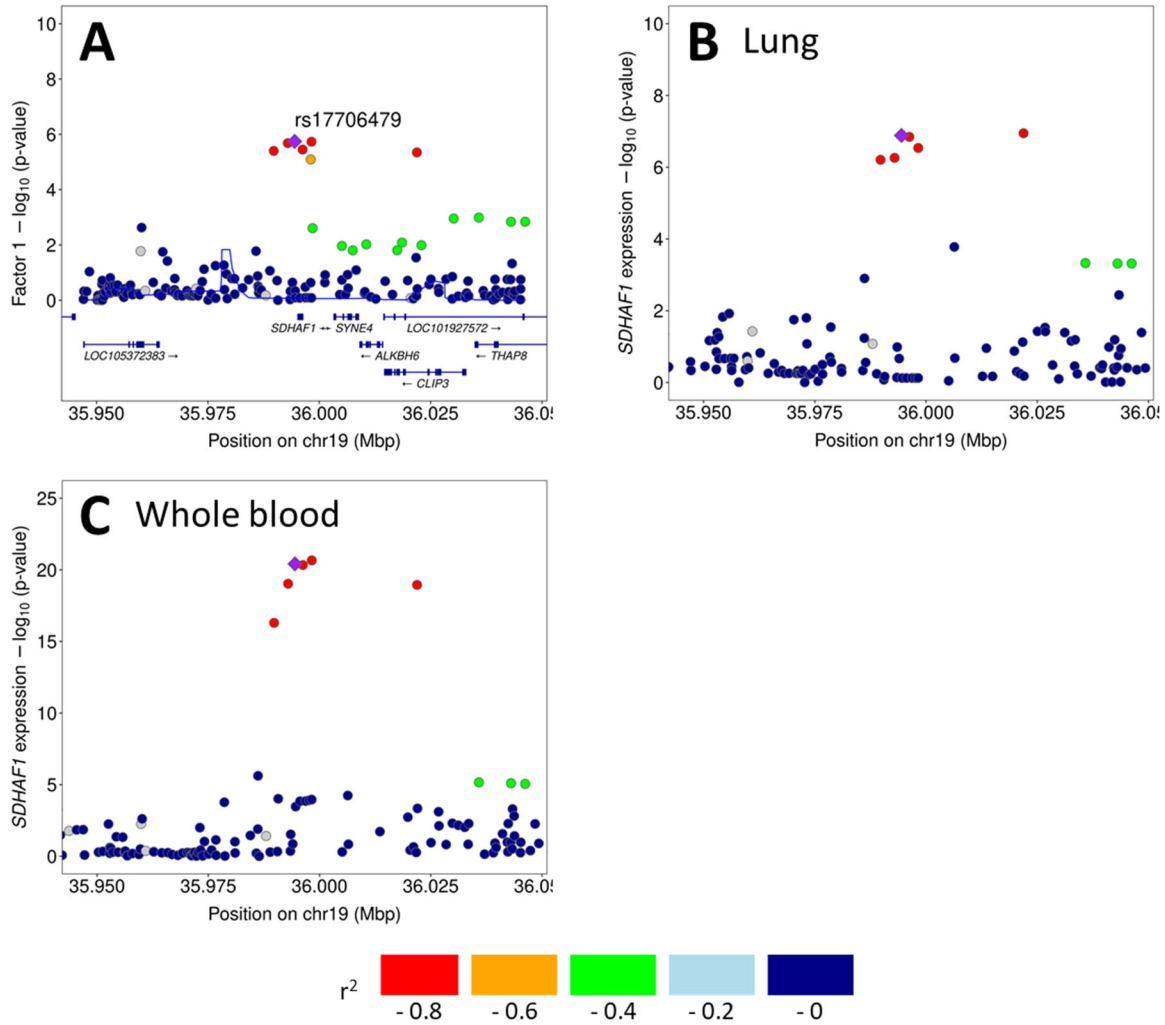

**Supplementary Figure 21.** LocusZoom plots for the association of single nucleotide variants with the estimated factor 1 (TDP-43 and hippocampal sclerosis) score in *SDHAF1* (A) and with the *SDHAF1* expressions in Lung (B) and Whole Blood (C) from TOPMed

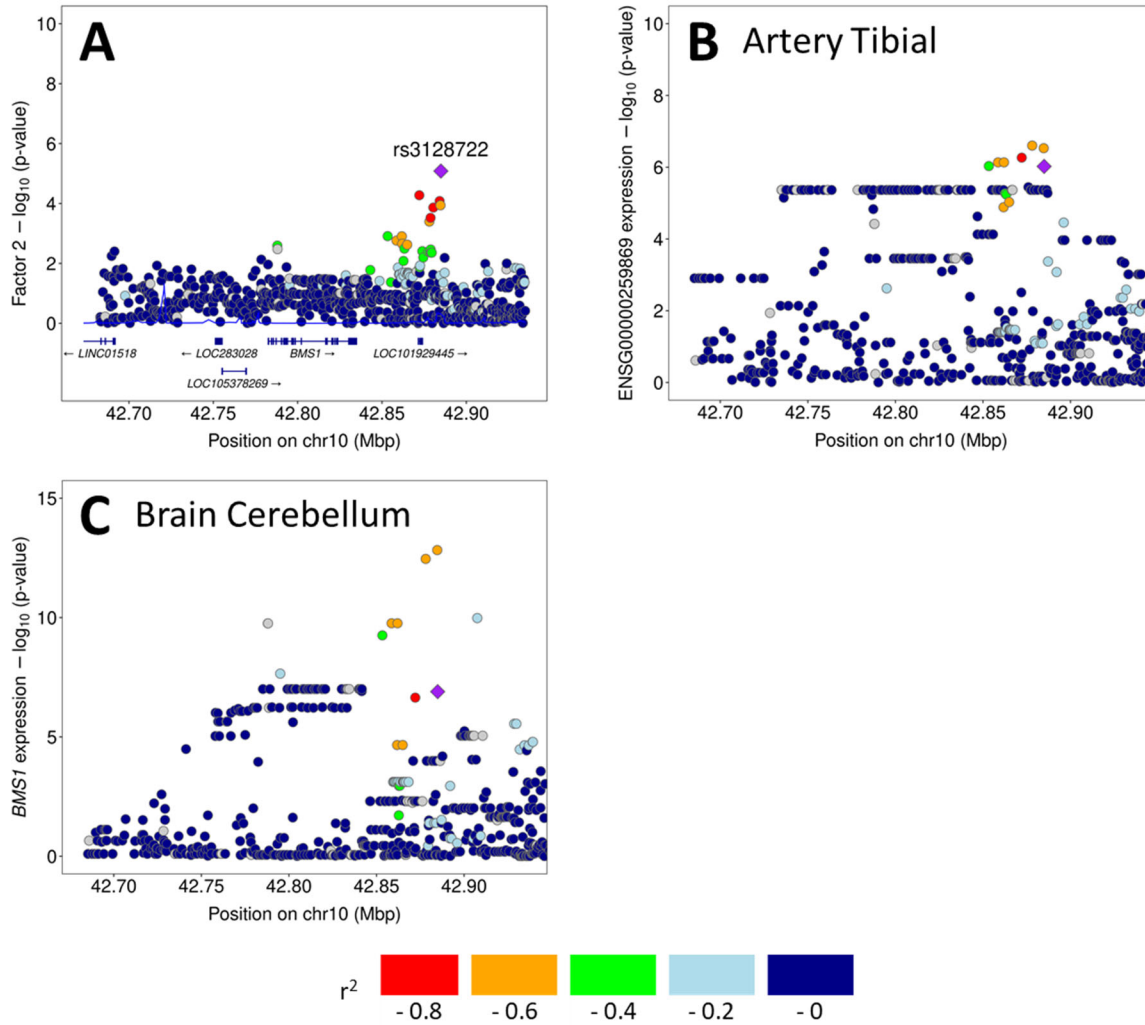

**Supplementary Figure 22.** LocusZoom plots for the association of single nucleotide variants with the estimated factor 2 (Alzheimer’s disease neuropathologic change) score in *BMS1* (A) and with ENSG00000259869 expressions in Artery Tibial (B) and with the *BMS1* expression (C) from GTEx
